# Supplementary material
Source: Research Square preprint supplement (doi:10.21203/rs.3.rs-8970665/v1)
Supplement: Supplementary file 1 [file 0315b2c3efa4bb39ed86e9b3.xlsx]

## Sheet: Sheet1
Sample_ID	Accession	Name	Origin
TB1	PI 196932	Frijol Bayo	Veracruz de Ignacio de la Llave, Mexico
TB2	PI 197041	G40003	La Libertad, El Salvador
TB3	PI 200902	G40005	La Paz, El Salvador
TB4	PI 201268	G40006	Chiapas, Mexico
TB5	PI 239056	G40008	Morocco
TB6	PI 263590	G40045	Sonora, Mexico
TB7	PI 307780	G40058	El Salvador
TB8	PI 310801	G40013	Rivas, Nicaragua
TB9	PI 310802	G40014	Rivas, Nicaragua
TB10	PI 312122	Frijol blanco dulce	Santa Ana, El Salvador
TB11	PI 312197	Frijol del monte	Sonora, Mexico
TB12	PI 319438	G40049	Sonora, Mexico
TB13	PI 319439	G40050	Sonora, Mexico
TB14	PI 319440	G40051	Sonora, Mexico
TB15	PI 319442	G40053	Sonora, Mexico
TB16	PI 319443	Serowi	Mexico
TB17	PI 319444	G40054	Sonora, Mexico
TB18	PI 319445	G40055	Sinaloa, Mexico
TB19	PI 319446	Gentry 22022	Sinaloa, Mexico
TB20	PI 319447	G10023	Durango, Mexico
TB21	PI 321637	G40022	Arizona, United States
TB22	PI 321638	G40023	Arizona, United States
TB23	PI 406633	G40025	Arizona, United States
TB24	PI 430219	8-1-5-2	New Mexico, United States
TB25	PI 440785	GN x475	Sonora, Mexico
TB26	PI 440788	GN x486	Mexico
TB27	PI 440790	GN x509	Sonora, Mexico
TB28	PI 440791	GN x512	Sonora, Mexico
TB29	PI 440795	GN x623a	Sonora, Mexico
TB30	PI 440798	bawi	Arizona, United States
TB31	PI 440799	bawi	Arizona, United States
TB32	PI 440800	GN 0876	Arizona, United States
TB33	PI 440801	pawi	Arizona, United States
TB34	PI 440802	soam pawi	Arizona, United States
TB35	PI 440803	GN x621	Arizona, United States
TB36	PI 440804	soam-pawi	Arizona, United States
TB37	PI 440805	bavf	Arizona, United States
TB38	PI 440806	pawi	Arizona, United States
TB39	PI 440813	GN x525	Arizona, United States
TB40	PI 458873	EAI 3734	Maryland, United States
TB41	PI 462025		Arizona, United States
TB42	PI 462026	T-247 Pale Green'	Arizona, United States
TB43	PI 477032	pawi	Arizona, United States
TB44	PI 477033	pawi	Arizona, United States
TB45	PI 477034	S'oam pawi	Arizona, United States
TB46	PI 477035	S'toti pawi	Arizona, United States
TB47	PI 477036	S'oam pawi	Arizona, United States
TB48	PI 477037	S'oam pawi	Arizona, United States
TB49	PI 477038	S'toti pawi	Arizona, United States
TB50	PI 477039	Wild tepary	Arizona, United States
TB51	PI 485595	Chatchimori	Arizona, United States
TB52	PI 502216	Wade beans'	Wyoming, United States
TB53	PI 502217	Wade beans'	Wyoming, United States
TB54	PI 527334	GN730	Sonora, Mexico
TB55	PI 549447	W6 7408	Mexico
TB56	PI 549787	WYOMING 27905'	Wyoming, United States
TB57	PI 638830	4	Mexico
TB58	PI 638832	11	Mexico
TB59	PI 638835	G40195	Unknown
TB60	PI 638837	M917	Mexico
TB61	PI 638838	M924	Mexico
TB62	PI 638839	M935	Mexico
TB63	PI 638909	GN 84118	Chihuahua, Mexico
TB64	PI 638910	GN 84119	Chihuahua, Mexico
TB65	PI 638923	T-241 White	Washington, United States
TB66	PI 638924	T-242 Brown	Washington, United States
TB67	PI 638925	T-243 Brown Speckles	Washington, United States
TB68	PI 638926	T-246 Blue Speckles	Washington, United States
TB69	PI 638927	DLEG 900643	Arizona, United States
TB70	PI 638928	DLEG 900680	Arizona, United States
TB71	PI 639201	1072	North Dakota, United States
TB72	PI 640945	432	Unknown
TB73	PI 640949	M910	Mexico
TB74	PI 640951	M912	Mexico
TB75	PI 640953	M916	Mexico
TB76	PI 640954	M918	Mexico
TB77	PI 640956	M926	Mexico
TB78	PI 640957	M927	Mexico
TB79	PI 640985	DLEG 880031	Arizona, United States
TB80	PI 640988	DLEG 900204	Sonora, Mexico
TB81	PI 640992	G40184	Querétaro, Mexico
TB82	PI 642116	M912	Mexico
TB83	PI 653236	M930	Mexico
TB84	PI 653254	W6 26650	New Mexico, United States
TB85	PI 661751	304	Unknown
TB86	PI 661752	M64	Mexico
TB87	PI 661753	393	Unknown
TB88	PI 661895	AZ0415	Arizona, United States
TB89	PI 666350	TARS-Tep 22'	Puerto Rico, United States
TB90	PI 666351	TARS-Tep 32'	Puerto Rico, United States
TB91	PI 691871	LBJWC-1235	Texas, United States
TB92	PI 692269	G40001-Seq	Puerto Rico, United States
TB93	PI 700879	G40041	South Africa
TB94	W6 25026	DLEG 890326	Arizona, United States
TB95	W6 32480	L242-45	Nebraska, United States
TB96	W6 32483	Nebr. #19	Nebraska, United States
TB97	W6 32484	Nebr. #21	Nebraska, United States
TB98	W6 32485	Nebr. #22	Nebraska, United States
TB99	W6 37172	G40199	Oregon, United States
TB100	W6 38693	G40022	Arizona, United States
TB101	W6 38694	G40022A	Arizona, United States
TB102	W6 38695	G40023	Arizona, United States
TB103	W6 38696	G40025	Arizona, United States
TB104	W6 38698	G40029	United States
TB105	W6 38710	G40042	Nebraska, United States
TB106	W6 38712	G40044	South Africa
TB107	W6 38731	G40075	New Mexico, United States
TB108	W6 38732	G40076	New Mexico, United States
TB109	W6 38766	G40117	United States
TB110	W6 38767	G40117A	United States
TB111	W6 38845	G40191	New Mexico, United States
TB112	W6 38849	G40195A	Texas, United States
TB113	W6 38850	G40195B	Texas, United States
TB114	W6 38851	G40196	Texas, United States
TB115	W6 38852	G40197	Texas, United States
TB116	W6 38853	G40198	Texas, United States
TB117	W6 38890	G40246	New Mexico, United States
TB118	W6 61431	WCBA-2021-0054	Arizona, United States
TB119	PI 197032	G40002	San Salvador, El Salvador
TB120	PI 256424	Menudo Blanco Arroz	El Salvador
TB121	PI 307805	G40010	El Salvador
TB122	PI 313488	88	Oaxaca, Mexico
TB123	PI 527335	Tcatcai Mori	Arizona, United States
TB124	PI 535200	NI 843	Durango, Mexico
TB125	PI 535202	NI 775	Arizona, United States
TB126	PI 535204	G40074	Mexico
TB127	PI 535205	NI 787	Sonora, Mexico
TB128	PI 535207	Xmayum	Campeche, Mexico
TB129	PI 535209	TARS 142	United States
TB130	PI 535210	NI 502	Mexico
TB131	PI 535213	TARS 305	Arizona, United States
TB132	PI 535214	TARS 306	Arizona, United States
TB133	PI 535215	TARS 307	Arizona, United States
TB134	PI 535219	INIA Oaxaca-88	Oaxaca, Mexico
TB135	PI 535221	G40035	Oaxaca, Mexico
TB136	PI 535222	TARS 434	Baja California (Norte), Mexico
TB137	PI 535227	TARS 512	Puerto Rico, United States
TB138	PI 535231	TARS 516	Puerto Rico, United States
TB139	PI 535233	TARS 518	Puerto Rico, United States
TB140	PI 638913	GN 700
TB141	PI 640986	DLEG 880087	Arizona, United States
TB142	PI 640987	DLEG 890042	Arizona, United States
TB143	PI 640989	DLEG 900547	Arizona, United States
TB144	PI 640990	G40075	New Mexico, United States
TB145	PI 640999	Frijoles de los Indios	Mexico
TB146	PI 653239	GN 780
TB147	PI 702622	Pratt 1	New Mexico, United States
TB148	W6 20108	GN 751101	Arizona, United States
TB149	PI 440809	GN x453	Arizona, United States
TB150	PI 440810	GN x521	Arizona, United States
TB151	PI 440811	GN x523	Arizona, United States
TB152	PI 477040	GN 699	Arizona, United States
TB153	PI 535236	TARS 011	Arizona, United States
TB154	PI 535237	TARS 012	Arizona, United States
TB155	PI 535238	NI 692	Arizona, United States
TB156	PI 535239	TARS 141	United States
TB157	PI 535240	TARS 152	Puerto Rico, United States
TB158	PI 535241	TARS 153	Puerto Rico, United States
TB159	PI 535242	NI 717	Durango, Mexico
TB160	PI 535243	NI 831	Durango, Mexico
TB161	PI 535244	NI 700	Arizona, United States
TB162	PI 535245	G40071	Arizona, United States
TB163	PI 535246	G40072	Arizona, United States
TB164	PI 535247	TARS 194	Arizona, United States
TB165	PI 535248	TARS 230	Arizona, United States
TB166	PI 535249	TARS 231	Arizona, United States
TB167	PI 535250	TARS 232	Arizona, United States
TB168	PI 535251	TARS 233	Arizona, United States
TB169	PI 535252	TARS 234	Arizona, United States
TB170	PI 535253	TARS 235	Arizona, United States
TB171	PI 535254	TARS 236	Arizona, United States
TB172	PI 535255	TARS 237	Arizona, United States
TB173	PI 535256	TARS 238	Arizona, United States
TB174	PI 535257	TARS 239	Arizona, United States
TB175	PI 535258	TARS 291	Arizona, United States
TB176	PI 535259	TARS 292	Arizona, United States
TB177	PI 535260	TARS 293	Arizona, United States
TB178	PI 535261	TARS 294	Arizona, United States
TB179	PI 535262	TARS 295	Arizona, United States
TB180	PI 535263	TARS 296	Arizona, United States
TB181	PI 535264	TARS 297	Arizona, United States
TB182	PI 535265	TARS 298	Arizona, United States
TB183	PI 535266	TARS 299	Arizona, United States
TB184	PI 535267	TARS 300	Arizona, United States
TB185	PI 535268	TARS 301	Arizona, United States
TB186	PI 535269	TARS 304	Arizona, United States
TB187	PI 535270	TARS 330	Arizona, United States
TB188	PI 535373	NI 713	Jalisco, Mexico
TB189	PI 535383	G40090	Durango, Mexico
TB190	PI 638908	GN 743
TB191	PI 638911	GN 84128	Chihuahua, Mexico
TB192	PI 638912	GN 8475	Chihuahua, Mexico
TB193	PI 640947	M64-2	Mexico
TB194	PI 640950	M911	Mexico
TB195	PI 640952	M913	Mexico
TB196	PI 640955	M923	Mexico
TB197	PI 640960	M934	Mexico
TB198	PI 640991	G40083	Durango, Mexico
TB199	PI 640993	G40233	Arizona, United States
TB200	PI 640995	G40257	Mexico
TB201	PI 640996	G40273	Chihuahua, Mexico
TB202	PI 642140	AZ5	Arizona, United States
TB203	PI 653241	GN 8442	Arizona, United States
TB204	PI 653249	DLEG 990123	Arizona, United States
TB205	PI 653251	DLEG 890041	Arizona, United States
TB206	PI 653252	DLEG 900550	Arizona, United States
TB207	W6 24877	AZ1	Arizona, United States
CK1	Sacation Brown	Check
CK2	Sacation White	Check
CK3	Blue Speckled	Check
CK4	Black tepary	Check
