# Supplementary material
Source: Research Square preprint supplement (doi:10.21203/rs.3.rs-8970665/v1)
Supplement: Supplementary file 2 [file 25c775b3b27550eaa44187c1.xlsx]

## Sheet: Sheet1
Field ID	USDA_Accession	Alanine	Allantoin	Arginine	Asparagine	Asparticacid	Glutamicacid	Glutamine	Glycine	Histidine	Isoleucine	Leucine	Lysine	Methionine	Phenylalanine	Proline	Serine	Threonine	Tyrosine	Valine
TB1	PI 196932	1.29173	-1.04654	-4.70451	-10.1787	-0.292634	6.80012	-0.198645	0.474746	-0.147708	0.116128	0.578306	1.06202	-0.0212342	0.375322	0.617146	-0.0411489	-0.041014	0.348242	3.34737
TB2	PI 197041	1.53145	-1.30973	0.220761	-7.17427	-0.599165	0.807186	0.328738	0.0875222	0.0543607	-0.100839	-0.17652	-0.138231	-0.0345282	-0.137828	0.0283167	-0.194388	-0.0462135	0.162114	4.66255
TB3	PI 200902	1.11162	-1.03041	-6.93311	-10.5432	3.86762	4.64012	-0.310216	0.292356	-0.0580624	-0.0571376	-0.149019	0.0540984	0.109267	0.219358	8.0225	-0.212212	-0.085144	0.442169	0.0852484
TB4	PI 201268	-0.52925	-0.125778	10.2199	0.843105	-8.3634	2.0662	-0.2195	-0.139808	-0.209825	-0.205687	-0.26402	0.702468	0.0185065	-0.462527	-3.09954	-0.273715	-0.472568	0.00333994	-1.57493
TB5	PI 239056	0.25805	-0.956207	-3.02494	-2.00318	0.0900719	6.1628	-0.437923	0.124916	-0.0868376	-0.176705	-0.230269	0.268843	0.0149223	-0.263804	-1.71304	-0.146124	-0.0136394	-0.0301488	1.24182
TB6	PI 263590	-0.0567785	0.19141	0.665859	4.2931	-3.03068	-1.39918	0.212647	-0.162534	-0.270672	-0.0489344	-0.0250269	-0.279132	-0.0350208	0.264557	-1.73713	0.447745	0.0665264	0.0397823	-0.295195
TB7	PI 307780	-0.161075	-0.330725	8.75211	5.63158	-12.6608	-3.46325	0.00544779	-0.0177477	1.09292	-0.071826	0.172276	-0.633114	-0.0424737	0.119208	-0.23456	-0.555647	-0.577149	0.084166	0.849162
TB8	PI 310801	0.89869	-0.906933	7.14587	-4.40388	-6.56742	2.82044	-0.13476	-0.0332889	0.316412	-0.105411	-0.203113	0.176118	0.0741097	0.579495	-0.281552	-0.267212	-0.223554	0.0642346	-0.827684
TB9	PI 310802	1.42946	-1.15758	19.6984	-7.47917	-9.37065	-3.26811	-0.252247	0.105948	-0.180943	-0.0837843	-0.118559	0.737236	0.0417663	-0.410633	-1.46309	-0.461727	-0.291831	0.115052	-1.22376
TB10	PI 312122	0.623058	-1.18344	21.9834	-7.16423	-9.2832	-6.29371	0.120263	0.280144	-0.186203	-0.0788961	-0.115934	0.521683	-0.0154108	-0.467094	-0.939866	-0.313581	-0.283207	0.115885	-1.20876
TB11	PI 312197	0.391132	0.562938	-0.688979	7.96278	-2.514	-1.31251	0.254553	-0.0427953	-0.324877	-0.0983829	-0.168259	-0.122381	-0.0158494	-0.20047	-2.81581	0.0190928	-0.219144	-0.0142145	-1.4697
TB12	PI 319438	-0.214643	1.61998	8.17596	-0.286216	-5.98974	-2.10117	-0.0838569	-0.146195	0.320007	-0.157485	-0.249211	0.136528	-0.010954	0.0397566	-2.99329	1.17331	0.00772944	-0.0863465	-0.955232
TB13	PI 319439	-0.300603	-0.272698	-1.54083	11.2218	-6.45325	0.246273	0.524635	0.107329	-0.00450249	-0.0765417	-0.0771384	-0.377644	-0.0443862	-0.0296714	-2.44841	0.130615	-0.111913	0.0683121	-1.06714
TB14	PI 319440	-0.167346	2.93945	-1.17476	4.10424	-0.390004	-0.523334	-0.118521	-0.071648	0.195144	-0.150935	-0.242154	-0.0297145	-0.0337612	-0.366965	-3.06676	-0.0206309	-0.175867	-0.0699678	-1.36491
TB15	PI 319442	0.262137	-0.347078	-6.71699	4.67323	-4.66929	2.01542	0.085751	0.21108	0.572132	-0.124552	-0.179211	-0.17018	-0.0702772	-0.0932879	0.231519	0.995213	0.181697	-0.0390603	2.41514
TB16	PI 319443	0.0837684	0.217646	-3.67672	-7.01636	5.42779	4.03455	-0.385768	-0.204123	-0.273555	-0.0866368	-0.111109	0.63051	0.051587	0.327794	1.63857	-0.180772	-0.30538	-0.0166478	-0.912433
TB17	PI 319444	-1.04767	0.343089	2.18281	5.89794	-3.90936	-1.92924	-0.0137338	-0.378097	0.133044	-0.11366	-0.075589	-0.159263	-0.0523605	-0.0107378	-1.39815	0.398186	0.323644	-0.0853499	-1.04107
TB18	PI 319445	-0.92479	0.259509	6.78727	5.83414	-5.96256	-5.33577	0.0677612	-0.186918	-0.369687	0.0265996	-0.136283	-0.564771	-0.0172719	-0.33323	-0.793349	0.2306	0.660448	-0.0851705	-0.710066
TB19	PI 319446	-0.0695988	0.0110378	12.4204	-4.73849	-6.59763	-1.99885	-0.0762566	0.0970561	0.157253	-0.157965	-0.223043	-0.0393779	-0.0476893	-0.60578	-1.9585	-0.351925	-0.471594	0.0320065	1.65894
TB20	PI 319447	-1.98094	1.68819	11.4762	-0.442276	-16.6673	-10.5423	-0.497739	0.340967	3.44148	0.0150215	0.0706134	0.0496036	-0.0110426	-0.437392	3.47297	0.687905	-1.15158	0.227577	-0.906897
TB21	PI 321637	0.34001	1.08633	2.6292	-3.65988	-2.89989	-3.98259	-0.168882	0.197496	-0.453631	0.0904962	0.0262719	0.385733	0.0390662	0.0184655	5.12876	-0.251117	-0.0661324	0.0570413	-0.185384
TB22	PI 321638	0.644219	1.36318	-2.2918	-3.50719	1.07689	-2.1482	0.00251727	0.157542	0.774897	-0.0344845	-0.11748	0.155338	0.0467562	0.732813	1.80665	-0.279984	0.155815	0.0719545	0.0918193
TB23	PI 406633	-0.970921	-0.362695	11.7501	-4.02272	-11.5093	-8.01798	0.0523798	-0.0172959	0.47005	0.321325	1.0883	0.100573	-0.0675432	-0.0420728	1.92618	0.209922	1.0841	-0.0219653	4.73496
TB24	PI 430219	-2.26799	0.366602	20.3951	-6.57433	-11.6758	-6.6184	-0.412985	0.0629133	0.552875	0.00352521	0.248101	0.896879	0.0370468	-0.792705	-3.46706	1.00298	-0.970047	0.16385	4.77848
TB25	PI 440785	0.437031	-1.31267	3.85237	-4.59272	-1.60556	-1.32468	0.00083595	0.146678	0.614678	-0.0875952	-0.0814062	-0.390018	-0.0172914	0.385193	3.68855	-0.234222	-0.119667	-0.0153539	-0.748912
TB26	PI 440788	1.22109	-0.836858	3.34833	-6.33589	2.83991	-1.75404	-0.0929198	0.199686	-0.2746	0.0173767	0.0442351	0.155005	-0.0110183	0.315715	0.485211	-0.220387	-0.106483	0.139954	-0.892677
TB27	PI 440790	-0.0902046	2.81126	8.73475	-7.45982	-6.4657	-4.83183	-0.343102	0.0782358	0.238772	-0.0926039	-0.175542	-0.014593	0.00245486	0.33999	5.03538	-0.219622	-0.105408	-0.020303	0.301127
TB28	PI 440791	1.02077	0.103113	8.37409	-8.43392	-7.56659	-5.44949	-0.422895	0.0364054	0.858612	0.0433765	0.0943469	-0.253505	-0.0407422	0.0720327	8.11119	0.0809809	-0.0830386	0.0253276	1.0009
TB29	PI 440795	0.529708	-0.284594	3.02838	-6.11114	-1.24509	-1.95221	-0.272548	0.0859403	0.390238	-0.0987592	-0.0733168	0.0390304	-0.0213919	0.0861164	4.74297	-0.215575	-0.291793	0.00132572	-0.00239394
TB30	PI 440798	1.69934	-1.06153	-2.83505	-4.97263	8.6168	1.16713	-0.0913591	0.184677	-0.392736	-0.117736	-0.0887772	0.621987	0.0123397	-0.237444	-1.8884	-0.13423	-0.196284	0.048814	-1.33606
TB31	PI 440799	0.923238	-0.727433	-1.82278	-3.28515	3.91089	1.18076	-0.00206731	0.245481	-0.401986	-0.0288643	-0.00297283	0.0783204	-0.00453802	0.0367097	-0.567688	-0.0693158	0.299645	0.0181785	-0.762682
TB32	PI 440800	0.74196	0.209949	-0.00892201	-5.86249	-1.16952	-2.67367	-0.138789	0.157268	-0.390329	-0.0588875	-0.125017	0.157666	-0.0258821	0.646602	8.00264	0.0265233	-0.19857	0.00154451	-0.591892
TB33	PI 440801	-0.389097	0.237645	8.02583	-9.25508	-5.13451	-4.11022	-0.115054	-0.0449328	0.045561	0.125793	0.101915	-0.0117216	-0.0659197	0.113838	8.13098	0.11096	0.170689	-0.00102599	-0.04983
TB34	PI 440802	-0.65169	0.583933	-11.6569	-4.7175	-6.04244	-3.44547	-0.365492	0.120475	1.79813	0.39754	0.507076	0.326989	-0.00824332	0.256809	20.6317	-0.0772943	0.504654	-0.027109	1.63303
TB35	PI 440803	0.0618463	0.332912	9.53577	-5.67704	-4.7381	-2.57374	-0.167968	0.124592	0.290463	0.294474	0.197206	0.256605	0.0243205	0.0267648	-0.622123	-0.0441891	0.151281	0.0160772	-0.00966868
TB36	PI 440804	0.71687	-0.708575	9.05606	-9.4618	-1.91357	-1.57788	-0.323679	0.222199	-0.464113	-0.0180394	0.0404469	0.165644	0.0018825	0.308483	1.62784	-0.297528	-0.0476363	0.144135	0.106188
TB37	PI 440805	-0.689155	-0.0569977	4.94584	-7.39047	-6.99167	-6.39322	-0.233608	0.0364214	0.531944	0.55413	0.56404	0.107115	-0.0530629	1.38251	9.23369	0.134571	0.161275	0.0264427	2.01422
TB38	PI 440806	0.0233764	-0.977668	10.3031	-5.48404	-9.81404	-5.70596	0.311027	0.0219283	1.09263	0.0408181	0.286042	-0.420857	-0.0489006	0.280619	5.01882	0.245674	0.242871	0.0900466	1.29713
TB39	PI 440813	0.401383	3.26443	-4.33104	4.76326	-5.56582	0.603973	-0.0754842	-0.187124	1.04677	-0.101868	-0.177108	-0.0837097	-0.0280116	0.88945	-0.46078	0.644147	-0.195041	-0.0415535	-0.813324
TB40	PI 458873	-0.258905	-0.96482	1.18177	-6.50648	3.6914	9.03149	-0.310673	-0.216938	-0.283594	-0.153466	-0.209056	0.0607351	0.0940105	-0.611152	-3.26877	-0.29284	-0.40322	-0.0270554	-1.50623
TB41	PI 462025	-0.499463	0.783096	-6.67701	-5.63089	-0.237679	0.426334	-0.246097	0.294505	0.53088	0.258014	0.240804	0.278243	0.038181	0.671371	6.09631	0.297143	0.191089	0.0443142	2.26634
TB42	PI 462026	1.50706	-1.18802	0.853617	-3.13436	1.09657	-1.47423	-0.105686	0.257147	-0.174785	-0.0385945	0.0240138	-0.184494	0.0179139	0.0354772	-0.58324	-0.243602	-0.214867	0.0643839	1.84065
TB43	PI 477032	1.9507	-1.13594	-11.0152	-7.20039	11.6326	0.644292	0.405641	0.23487	-0.264631	0.0341641	-0.0120757	-0.156003	0.00964644	0.300466	-1.43273	0.294414	0.0660487	0.140835	5.15858
TB44	PI 477033	1.2897	-0.678409	-10.808	-9.40739	7.3408	0.0661303	-0.286653	0.200065	-0.4258	0.697951	0.566912	0.0139171	-0.0207248	1.23063	8.34273	0.153323	0.171106	0.0866269	1.65387
TB45	PI 477034	-0.20108	-0.38305	2.7495	-6.69794	-5.35423	-4.26629	-0.269647	0.0456246	0.518841	0.680612	0.425808	-0.156517	-0.0281238	1.3729	8.39158	-0.0506102	0.0793611	-0.0170222	1.97942
TB46	PI 477035	1.03652	-1.11456	-2.64558	-6.27261	5.12853	-1.53006	-0.145441	0.327153	-0.149311	-0.0453772	-0.0120694	0.398922	-0.0116363	0.636335	4.81074	-0.165537	0.116942	0.0556014	-0.886655
TB47	PI 477036	-0.173523	-0.0243012	5.42251	-7.43796	-5.02074	-4.38638	-0.243251	0.162199	0.612104	0.377802	0.343603	0.0481814	-0.0363207	0.380754	6.79007	0.169577	0.400233	0.0187519	1.13687
TB48	PI 477037	1.46137	-0.0240031	0.379071	-1.37824	-2.43363	-1.05616	0.0215916	0.340338	-0.278272	0.0298374	-0.0118663	0.140739	-6.55e-05	0.89055	1.28038	-0.073272	0.103523	0.0368546	-0.223398
TB49	PI 477038	0.641859	-1.16828	9.93757	-5.42947	-1.73498	-4.32826	-0.196807	0.126161	0.352275	-0.0851427	-0.171246	-0.164624	0.0366055	0.160228	1.28168	-0.194082	-0.206214	-0.0277516	-0.520154
TB50	PI 477039	1.54792	0.204661	-2.4159	0.392951	-0.529854	-1.24422	0.350468	0.321391	-0.395515	0.126404	0.0448381	0.167671	-0.028057	-0.112636	0.609005	0.423106	0.151234	0.0786008	-0.378672
TB51	PI 485595	NA	NA	NA	NA	NA	NA	NA	NA	NA	NA	NA	NA	NA	NA	NA	NA	NA	NA	NA
TB52	PI 502216	-0.116046	0.895707	1.24257	-0.983213	-6.29565	-2.76827	-0.0637773	0.021924	0.00229062	-0.101764	0.318184	-0.121126	0.0113491	0.0442629	6.22925	-0.246013	-0.135498	0.0109639	1.22998
TB53	PI 502217	-0.433653	-0.0366364	6.40098	7.01795	-7.85978	-5.59297	0.10008	-0.068506	1.04265	-0.0913227	-0.122296	-0.219486	0.0391294	0.0177335	-0.448873	-0.255007	0.0357403	-0.0587142	-0.534585
TB54	PI 527334	-0.0687675	-1.04332	-2.54954	3.45332	4.14113	-1.57001	-0.233655	0.0154421	-0.356065	0.0527353	-0.00211949	-0.128166	-0.0130988	-0.186849	-1.37477	0.660894	0.0158118	-0.0505684	-0.800702
TB55	PI 549447	1.71438	-0.96111	4.66359	-7.49606	-5.82246	-5.49231	0.424483	0.528666	0.1664	0.0651631	0.0778499	-0.038177	-0.045862	0.290251	9.34618	0.226571	0.105276	0.0435408	0.423302
TB56	PI 549787	0.742116	-0.755975	5.35648	-5.052	1.59761	-3.03486	-0.177716	0.196218	-0.513003	0.0119269	-0.00157912	0.146671	-0.00876017	0.505655	0.729686	-0.282089	-0.223175	0.0424928	-0.565826
TB57	PI 638830	-1.4307	0.133512	-12.3941	10.5591	10.6214	0.525858	0.321454	-0.4682	-0.501349	-0.0824618	-0.134762	-0.409854	0.0719083	-0.336256	-3.24326	-0.0674724	-0.262578	-0.149042	-1.21299
TB58	PI 638832	-0.902847	-0.767616	-16.4746	10.5156	11.1127	4.34877	-0.00829556	-0.336455	-0.407995	-0.160408	-0.0439053	-0.299713	0.107305	-0.460713	-2.13924	-0.147407	-0.519481	-0.00681224	-1.35583
TB59	PI 638835	-1.22656	2.59651	-4.32017	2.45122	-0.094538	1.75382	0.579656	-0.207819	-0.33393	0.259792	0.195575	-0.0682927	-0.0221159	-0.503993	-2.3498	2.16747	0.465651	-0.0405602	-0.900526
TB60	PI 638837	0.549094	-0.436935	-0.635052	9.5021	-8.49856	-2.40931	-0.0688919	0.145265	0.574459	0.172319	-0.0275277	-0.475244	0.0410084	-0.198602	0.399421	0.203236	1.24949	-0.0368722	-0.270526
TB61	PI 638838	-0.118043	-0.456257	-3.44715	8.48856	0.93271	-0.413633	-0.180483	-0.0965577	-0.061968	-0.0384964	-0.143038	-0.17332	-0.0590275	-0.451152	-2.27969	-0.367458	0.437364	-0.102146	-1.19953
TB62	PI 638839	-1.50349	2.7605	7.21609	-9.48918	4.04638	1.76438	-0.0737575	-0.491689	-0.127497	-0.19443	-0.27008	-0.0927391	-0.0688596	0.00504966	-2.1355	-0.44273	-0.237837	-0.108337	-1.50453
TB63	PI 638909	-0.348546	-0.843206	4.61932	6.79728	-3.4734	-3.66882	0.276674	-0.0289319	-0.335734	-0.070554	-0.067058	-0.241383	-0.0624265	-0.397028	-2.3105	-0.130535	-0.36606	-0.0512265	-0.837802
TB64	PI 638910	-0.907176	1.49982	-15.7207	-2.59383	20.1777	4.43735	0.43002	-0.285052	-0.592389	-0.126307	0.069216	-0.265082	-0.0327952	-0.583432	-2.35177	-0.115677	-0.299824	-0.0984417	-1.04254
TB65	PI 638923	0.778511	-0.855985	4.59236	-6.15857	-4.37378	-4.35943	-0.303882	0.176813	0.408703	0.0993793	0.0219144	-0.196444	-0.0298778	0.161831	6.24265	-0.378099	-0.298073	0.0124849	2.83931
TB66	PI 638924	0.152536	-0.892325	5.02751	-3.06438	-3.78352	-4.45419	-0.124371	0.114892	0.274491	-0.0571161	-0.0412904	0.0241418	-0.0282021	1.04437	5.17908	0.118906	-0.104446	-0.0389578	-0.406294
TB67	PI 638925	1.506	0.593773	1.75754	-6.68139	1.11322	-2.05181	-0.0575166	0.33429	0.215195	-0.0791808	-0.170476	0.462611	-0.00122917	0.695678	1.8116	0.031178	0.184773	0.118201	-0.939376
TB68	PI 638926	0.330374	-0.375918	10.4524	-8.06549	-0.715761	-4.72991	0.152418	0.126031	0.783814	-0.019769	-0.078714	0.236981	0.0167597	-0.231303	1.28681	-0.232112	-0.331842	0.0588508	-0.780944
TB69	PI 638927	0.343089	-0.231224	-14.311	9.45738	1.87697	1.14172	-0.213559	0.24081	-0.338635	0.153485	0.0720518	0.450193	0.0633655	0.576696	0.657161	0.789887	0.231556	-0.013959	0.146665
TB70	PI 638928	-0.137012	0.756375	-5.60645	-0.0644254	7.69729	2.15625	0.0147964	-0.0901191	-0.448739	-0.101894	-0.121995	0.0342951	0.0275993	-0.404172	-2.7	0.0685272	0.698127	-0.0701698	-1.31624
TB71	PI 639201	-0.295251	-0.44659	4.45247	2.62231	-2.09597	-0.41973	-0.248186	-0.0585075	-0.1192	-0.114013	-0.187434	0.104802	-0.0781637	-0.442266	-2.69799	0.00506213	0.433244	-0.0621112	-1.17106
TB72	PI 640945	-0.658445	4.53308	-4.76915	5.29293	-1.24841	1.54099	-0.0401265	-0.57352	0.348816	-0.166425	-0.0980777	-0.286918	0.0517573	-0.213143	-1.60542	-0.0937322	-0.0873248	0.0116057	-1.39136
TB73	PI 640949	-0.456648	0.798101	-4.95667	4.64243	3.93254	-1.87346	0.257222	-0.0890569	-0.327027	-0.0018924	-0.11719	-0.268678	-0.0498739	-0.328722	-1.10726	-0.151108	0.552606	-0.0762884	-0.529245
TB74	PI 640951	0.0799564	-0.636209	-3.66808	5.69497	-2.83583	0.594851	0.0821166	-0.095502	-0.230273	0.0852633	0.0923489	-0.309063	-0.0636214	0.0749351	-0.879903	-0.0535788	0.600058	-0.0729829	1.31242
TB75	PI 640953	-0.125313	-1.08892	-0.769057	8.3872	-4.89531	-2.47875	-0.0351565	-0.0935796	0.760658	0.0781681	0.0516748	-0.15147	-0.0516256	0.0951689	-0.693195	0.0445043	0.208519	-0.0181396	0.281995
TB76	PI 640954	-0.159024	1.00337	-13.977	-4.00739	-4.64851	8.95099	1.39294	0.394598	2.04189	0.617835	0.439254	0.0470477	0.0631942	0.53672	6.23695	2.46592	0.703382	0.0993782	-0.998695
TB77	PI 640956	-0.732609	2.50544	-9.03057	3.64891	-3.75581	8.79196	0.696872	-0.474091	-0.0428251	-0.0242591	0.00264497	-0.302137	0.00693883	0.556	0.342243	-0.102479	-0.305999	0.0363711	-0.789992
TB78	PI 640957	-1.0154	0.505107	-12.0063	2.06362	5.23892	5.28826	1.16908	-0.475334	-0.628514	0.0995071	0.345959	-0.262511	0.00452521	-0.120186	-1.10955	-0.332834	-0.238437	-0.0561779	2.29324
TB79	PI 640985	-1.26818	-0.265397	12.4113	-0.540491	-5.58145	-4.13695	-0.0800419	-0.250854	0.294037	-0.157673	-0.218924	-0.127312	-0.0743005	-0.410158	-2.91885	-0.301052	-0.516343	-0.102302	2.15301
TB80	PI 640988	0.550594	-0.454235	4.42078	-0.834734	-1.01537	-1.22769	-0.471092	-0.0727176	0.0320955	-0.0855135	-0.179268	1.6718	0.0301947	-0.463164	-3.00612	0.184607	0.416678	-0.0616937	-0.45762
TB81	PI 640992	NA	NA	NA	NA	NA	NA	NA	NA	NA	NA	NA	NA	NA	NA	NA	NA	NA	NA	NA
TB82	PI 642116	-0.00827198	-0.726037	-5.57608	7.90848	-0.352801	0.0784148	-0.0288053	0.0218075	-0.316604	0.259512	0.117982	-0.280253	-0.0385226	-0.0564722	-1.23915	-0.0842444	0.971747	-0.0634304	-0.210856
TB83	PI 653236	-1.49198	1.93434	-1.64506	9.79367	-4.9853	-0.739941	0.292049	-0.457149	-0.79147	-0.201213	-0.258382	-0.132362	-0.081381	-0.22498	-0.107267	-0.348697	0.557148	-0.14907	-1.17751
TB84	PI 653254	0.0963993	-0.661102	-3.01121	-0.435577	3.9749	-1.32092	0.0501368	-0.0796862	-0.441557	-0.0579164	-0.143603	0.0137251	-0.0318389	-0.14646	-1.96857	-0.234149	-0.0225745	-0.0124061	3.65884
TB85	PI 661751	-0.375647	-0.774708	-7.70237	-2.4066	2.96434	5.75205	-0.128346	6.09e-05	-0.255209	-0.076481	-0.0676775	0.132525	-0.0656169	0.483603	4.43362	-0.254757	-0.112593	0.0574174	-0.498421
TB86	PI 661752	-0.883279	1.25716	0.0200275	1.77455	2.2575	0.130348	0.0484143	-0.287449	-0.530088	-0.0873306	0.00666411	-0.19882	-0.0176686	-0.387898	-1.76164	-0.260858	0.282518	-0.129098	-1.04487
TB87	PI 661753	-0.684339	-0.097742	0.974783	9.36056	-2.19618	-2.63683	0.0363021	-0.355523	-0.450682	-0.132173	-0.137405	0.341298	0.590699	-0.276076	-2.27562	-0.146879	-0.26031	-0.1556	-1.21943
TB88	PI 661895	-0.203193	-1.60188	-5.94886	7.02418	3.10347	1.46884	0.722258	-0.00802464	-0.44158	-0.0567047	-0.117812	-0.366407	-0.0730042	-0.193889	-1.02043	-0.275981	-0.101819	-0.0500571	-0.960892
TB89	PI 666350	0.67014	-1.55331	4.79693	-4.96711	0.172782	-3.50685	-0.191733	0.393852	0.580687	-0.0791687	-0.00589879	-0.119086	-0.0420159	0.212396	3.69595	-0.397914	-0.0841127	0.0839437	-0.217492
TB90	PI 666351	0.272149	-1.32997	3.93595	-8.09575	-2.10531	-2.90929	-0.173121	0.0594826	0.0300343	0.195114	0.0740927	-0.103038	-0.0310358	1.76288	4.68992	0.0275118	-0.015472	-0.0140614	2.87089
TB91	PI 691871	-0.299416	3.5904	-13.0744	0.89737	3.60501	4.97384	0.731952	-0.213709	-0.223568	-0.00494285	-0.0460095	0.0282433	-0.0473039	-0.340347	-0.194361	-0.261412	-0.104476	-0.0257094	2.25716
TB92	PI 692269	2.06323	-0.949666	-0.0641894	-5.80966	10.9264	-1.6186	-0.167087	0.100532	-0.416084	0.0491297	0.0189154	0.201781	0.0338614	-0.00314635	-2.76312	-0.4481	-0.21401	0.0107808	-1.06108
TB93	PI 700879	0.647504	0.0032418	1.49905	-4.71863	-0.87805	-3.26708	-0.157368	0.52637	0.447318	0.062278	-0.01922	0.0382209	0.0319942	0.914944	4.64634	-0.0245368	-0.0157989	0.158039	-0.261746
TB94	W6 25026	-0.31565	-0.753574	-3.70699	10.3125	-7.01108	2.86747	0.264339	-0.174312	0.148342	0.202708	0.042499	-0.458107	-0.0364886	0.559684	-1.07509	-0.104883	0.320118	-0.0432032	-0.0937438
TB95	W6 32480	1.25531	-0.239987	0.944352	-2.19593	3.33911	-2.40696	-0.0968157	0.23486	-0.124081	-0.0721197	-0.105776	0.352942	0.0200716	-0.00096938	0.26017	-0.408363	-0.428528	0.0438165	-0.592141
TB96	W6 32483	1.11199	-1.13879	-3.67732	-5.59037	5.56313	0.720536	-0.202651	0.160293	-0.446985	-0.0712923	-0.053186	0.0988121	-0.00406963	0.0706281	5.08029	-0.451142	-0.302348	-0.00642519	-0.508143
TB97	W6 32484	0.677432	-0.654986	0.565383	-1.00713	0.487791	-3.62757	-0.204513	0.129617	-0.332497	-0.0239862	-0.105359	0.226231	-0.0275755	-0.0289109	0.736172	-0.524456	-0.119034	0.00479082	3.21024
TB98	W6 32485	0.908192	-0.768549	5.40865	-7.34436	-1.26896	-1.98642	-0.337754	0.16637	-0.432866	0.0146184	0.0337819	-0.0924547	-0.0418536	0.429956	4.65411	-0.212325	-0.18848	0.0311835	0.284992
TB99	W6 37172	-1.66659	0.387222	19.6162	-7.92015	-2.9479	-0.608797	-0.0733171	-0.534713	-0.486797	-0.153876	-0.197028	-0.11947	-0.0634771	-0.464121	-3.51234	-0.558638	-0.830686	-0.0802044	-1.45203
TB100	W6 38693	-0.0857572	-1.11048	5.86067	-5.69283	-1.36157	-5.17782	-0.200209	0.0823802	-0.0337688	0.319867	0.262904	0.276139	-0.0352854	0.429672	2.00613	-0.118751	0.304562	0.0197106	2.94261
TB101	W6 38694	-0.722997	-0.114119	-5.85601	-1.12233	14.7543	-2.28067	0.143147	-0.157951	-0.343955	0.174284	0.14317	0.139385	0.0603669	-0.434548	-2.92625	-0.0721683	0.563994	-0.0888861	-1.06567
TB102	W6 38695	0.639065	-1.40071	-8.58582	-4.03363	10.4643	8.16744	-0.423659	0.058477	-0.386325	-0.101839	-0.123541	0.398006	0.0566026	-0.109708	-1.53972	-0.490213	-0.208175	-0.0151866	-1.22624
TB103	W6 38696	0.484952	0.0126295	10.8103	-8.00797	-4.88469	-4.97008	0.0301906	0.297163	0.30699	1.16925	1.01868	0.258595	0.00142332	0.305132	-0.129804	0.252833	0.714742	0.0237509	1.36112
TB104	W6 38698	-0.409322	-0.992245	-4.73435	-9.38405	14.6597	4.1731	0.313787	-0.179077	-0.212548	-0.069562	-0.0166899	0.212014	-0.046293	-0.0627176	-1.29476	-0.304103	0.176197	-0.0220175	-1.084
TB105	W6 38710	0.449763	-0.790661	1.85487	-8.48083	0.766763	1.46927	-0.491982	0.00686003	-0.199672	-0.0487215	-0.0778384	0.265383	-0.0306077	0.0144748	2.49091	-0.357645	-0.171876	0.00342299	2.7107
TB106	W6 38712	-0.354764	0.531716	-9.05917	6.12221	7.15441	-0.789559	0.326268	-0.148429	-0.385388	-0.0417367	-0.168188	-0.0936652	-0.0731948	0.0645388	-1.14544	0.21613	-0.161535	-0.0757271	-0.749781
TB107	W6 38731	-1.13179	3.02653	-8.75473	5.7596	3.00691	4.20266	0.554459	-0.356527	0.150855	-0.14894	-0.0945692	-0.128912	-0.0317441	-0.557384	-2.3823	-0.198652	-0.342307	0.0131003	-1.16263
TB108	W6 38732	-1.01708	3.58073	-0.820818	2.56183	-0.691788	2.29153	0.791421	-0.538137	0.937868	-0.14683	-0.174684	-0.557934	-0.0684975	-0.546265	-2.73153	-0.285247	-0.684008	-0.0348048	-1.32709
TB109	W6 38766	-1.34957	1.47457	-1.48422	19.2951	-10.0911	-6.2535	1.70102	-0.465465	1.24446	-0.0164206	-0.0681016	-0.499539	1.22252	0.59731	-3.00336	-0.0362736	-0.56771	-0.141172	-0.931207
TB110	W6 38767	-1.63144	5.79588	-3.04426	16.1306	-5.73178	-4.28555	0.148794	-0.539359	0.105831	-0.106586	-0.171853	-0.614318	-0.04956	-0.599743	-2.60875	-0.437077	-0.204898	-0.157746	-0.956763
TB111	W6 38845	-1.29254	3.12537	-1.89234	1.41811	3.4271	2.8463	0.844089	-0.58229	-0.561569	-0.169242	-0.197995	-0.512462	-0.0807851	-0.575106	-2.83759	-0.280738	-0.622373	-0.062712	-1.29818
TB112	W6 38849	-0.934948	0.950964	2.93877	2.53445	1.51299	-0.724771	0.221455	-0.232232	-0.536862	-0.162057	-0.13845	-0.27803	-0.0446447	-0.428517	-2.78013	-0.247128	-0.329287	-0.054785	-1.28868
TB113	W6 38850	-1.5337	2.93922	1.01855	11.552	-4.39921	-2.46677	-0.107512	-0.431427	-0.157099	-0.172619	-0.189486	-0.627825	-0.0800124	0.321072	-2.85421	-0.252209	-0.531269	-0.100701	-1.24568
TB114	W6 38851	NA	NA	NA	NA	NA	NA	NA	NA	NA	NA	NA	NA	NA	NA	NA	NA	NA	NA	NA
TB115	W6 38852	-1.10558	4.10866	-11.6307	10.8135	3.97878	2.25364	0.23445	-0.380599	-0.293736	-0.131052	-0.137594	-0.290408	-0.0409285	-0.52035	-2.75023	-0.286957	-0.599435	-0.00425941	-1.25119
TB116	W6 38853	-1.07231	4.18669	-6.64279	9.99447	-0.336381	0.698881	0.697698	-0.374672	-0.0468222	-0.118062	-0.154388	-0.352197	-0.0500969	-0.472547	-2.42374	-0.438717	-0.491372	0.0495133	-1.34082
TB117	W6 38890	-0.807359	2.10407	-0.848666	10.4159	-2.19071	-1.04309	0.186358	-0.495623	0.118062	-0.191795	-0.115399	-0.599916	-0.0231829	-0.600837	-2.23337	-0.54997	-0.804338	-0.0967393	-1.44169
TB118	W6 61431	-0.969135	0.342724	-2.96536	5.59197	3.99745	-3.84026	0.0514604	-0.14099	-0.173059	0.077686	-0.0358912	-0.404632	-0.0663517	0.0980795	-0.163435	0.138692	0.00648363	-0.0912154	-0.659852
TB119	PI 197032	0.676187	-0.0706375	-9.19495	-6.10324	12.2364	6.36633	0.268365	0.147559	-0.236998	0.00998944	0.219068	0.0930946	0.395758	-0.154811	-2.07777	-0.291276	-0.122094	0.213421	-1.18469
TB120	PI 256424	1.51203	5.34e-05	0.626718	-3.60531	-5.63975	-4.15919	-0.0942225	2.07666	0.446159	0.271558	0.856557	2.73498	0.704412	0.932932	1.47967	0.370307	-0.731809	0.747284	-0.0303367
TB121	PI 307805	0.0415928	-1.34853	20.7041	-5.49499	-7.70703	-3.95516	-0.150455	-0.054564	-0.313727	-0.0885052	-0.117415	0.236657	0.659133	-0.441355	-2.36174	-0.432626	-0.227328	0.0975501	-1.2248
TB122	PI 313488	0.662449	-0.766641	13.0996	-4.78382	-8.59452	-0.986487	-0.261334	-0.27011	0.298455	-0.0611462	-0.160182	-0.133823	-0.00709651	-0.473218	0.675871	-0.324153	-0.280256	-0.0792448	0.960711
TB123	PI 527335	-1.87949	-1.78151	-3.63002	-15.0327	-0.324167	-3.50372	-0.480968	-0.872521	0.705976	0.463772	0.52754	2.70764	0.180876	-0.391815	-2.74182	1.74643	-0.831988	0.63856	21.4004
TB124	PI 535200	1.67031	0.789443	-6.42553	0.148179	-7.90124	10.4942	-0.571398	0.542093	0.302017	0.122577	0.27378	0.174845	0.0262513	-0.299146	1.34589	0.12125	-0.303679	0.100946	-0.3669
TB125	PI 535202	0.0559392	-0.149227	-14.3631	0.565243	8.09547	5.91334	-0.645206	0.345549	-0.323218	0.00968324	0.154026	-0.389791	0.186467	0.031138	-0.286624	2.97561	0.443333	-0.0473589	-0.545733
TB126	PI 535204	0.692416	2.78454	1.67409	5.14217	-3.14789	-2.58164	-0.652333	0.255309	-0.0632087	-0.0624307	0.246774	-0.313404	0.0908474	-0.485708	-2.31525	0.0029113	-0.587015	0.0158223	-1.04264
TB127	PI 535205	2.03973	-0.293375	-11.3908	0.812401	6.95831	5.84711	-0.336723	0.061587	0.550564	0.0036426	-0.0116977	0.110334	-0.0969107	0.196727	-1.84843	-0.0246297	0.162773	0.021305	-0.893632
TB128	PI 535207	3.18017	-1.63847	-8.18106	-7.53989	3.18886	6.4038	0.204417	0.934096	0.942362	0.0365233	-0.0483917	0.508996	-0.0200489	-0.364239	3.04417	-0.084701	0.491291	0.239197	-0.366111
TB129	PI 535209	-0.89384	-0.126528	-14.3756	-5.73703	14.9	12.9826	-0.124426	-0.146753	-0.0020392	-0.128706	-0.00838284	-0.0150166	-0.0754933	-0.0652805	-2.57793	-0.0248842	-0.0016289	0.0734595	-1.04898
TB130	PI 535210	0.975743	0.636119	-8.16407	-1.71085	8.03636	3.02333	-0.111589	0.290927	-0.0532482	-0.0801258	-0.156891	0.0465912	0.0367822	-0.004692	-0.692535	-0.062454	0.281357	0.0646459	-0.703305
TB131	PI 535213	0.920315	0.00192884	4.7966	-1.20276	-0.12746	-0.99834	-0.189754	0.138522	0.0617075	-0.0984348	-0.192067	0.0913564	0.0516923	-0.178793	-1.66626	-0.253033	-0.097367	-0.002903	-0.903023
TB132	PI 535214	1.05169	-1.4859	1.02255	-6.66812	0.458961	-3.65528	-0.390536	0.259718	-0.152468	0.102761	0.407788	0.0265026	0.0130619	0.306009	6.86556	-0.109562	0.250367	0.0802956	1.68139
TB133	PI 535215	0.17324	-0.704773	-1.11707	-6.96487	3.17855	8.56727	-0.423085	-0.150428	0.0221706	-0.137644	-0.172202	0.145249	-0.0408179	0.0673802	0.324513	-0.46187	-0.36343	-0.0444429	-0.936058
TB134	PI 535219	0.165511	-1.47787	-6.54445	-2.04712	-1.35728	12.1193	-0.357512	-0.0525703	-0.201056	-0.0359104	-0.117432	0.201841	0.00534925	-0.248738	-0.185984	-0.379334	-0.33491	-0.0284983	2.19262
TB135	PI 535221	-0.0467835	-1.60007	11.9287	-0.676468	-5.19766	-4.54984	-0.0246801	-0.232659	-0.315835	-0.0452494	-0.123446	0.000268415	-0.0471992	-0.548243	-1.37612	-0.520828	-0.560279	-0.0641489	2.85693
TB136	PI 535222	1.34628	-0.354305	7.52518	-0.00119353	-3.41443	-4.1491	-0.450391	0.0495785	-0.322692	-0.0296162	-0.112059	1.94062	-0.0147213	-0.0785979	-2.04026	0.127588	-0.019168	-0.0350008	-0.717769
TB137	PI 535227	0.0850166	-0.50405	0.190712	-4.57769	4.64364	-0.392446	-0.456803	0.0615783	-0.174255	0.0278566	-0.0614618	0.365309	-0.00215072	-0.110264	-1.21295	-0.500024	-0.28427	-0.0675955	3.06041
TB138	PI 535231	0.136388	-0.854692	5.43215	-5.70829	-1.04378	0.528583	-0.483638	0.110166	0.327055	-0.0349891	-0.0823965	0.0437577	0.0554325	-0.239571	2.22308	0.513225	0.123077	-0.0549592	-0.762679
TB139	PI 535233	0.228363	-1.18406	-6.06027	-2.277	4.56858	4.69763	-0.447596	0.218009	-0.425983	-0.102758	-0.190317	0.0824394	-0.0263186	-0.0297684	-1.26976	-0.245727	0.261306	-0.0487481	3.23218
TB140	PI 638913	1.04781	-1.22922	-11.535	-0.926313	3.50631	4.56239	-0.311701	0.14013	-0.372741	0.133244	0.0647806	-0.193227	-0.0752983	-0.155275	-0.357393	0.315702	0.0905399	0.00483412	6.2269
TB141	PI 640986	-0.595688	-0.466707	0.29744	7.11044	-1.35309	-2.30785	0.0192296	-0.0992262	-0.48291	0.17666	0.0698142	0.102834	-0.0787122	0.472337	-1.79554	-0.122921	0.286081	-0.0364599	-0.374187
TB142	PI 640987	-0.0283898	-0.965726	-16.2877	-0.782525	3.90038	1.51319	0.235352	0.0807395	-0.576074	0.111431	-0.00243432	-0.271191	-0.0325868	0.647415	0.243345	6.99277	2.58411	-0.0292351	5.06544
TB143	PI 640989	-0.321039	-1.59745	5.25975	2.54344	0.442732	-0.69713	-0.0757263	-0.0582361	-0.199437	-0.11014	-0.164173	-0.547274	-0.105353	-0.480817	-2.23648	-0.44993	0.512813	-0.0754876	-1.10221
TB144	PI 640990	-0.850192	-1.26324	-9.02122	4.7743	7.86633	4.15257	0.445424	-0.400001	0.635906	-0.176139	-0.123728	-0.133863	-0.0139996	-0.516148	-1.23043	-0.326224	-0.362846	-0.0944565	-1.17403
TB145	PI 640999	1.85959	0.329326	-0.5761	-5.71164	-3.2752	-1.97452	-0.513303	0.205788	0.523949	-0.0136144	-0.0400564	0.266804	-0.0296985	0.263514	6.6656	-0.134604	0.295045	0.00674012	1.95241
TB146	PI 653239	0.174998	2.19449	8.30259	-2.92721	-0.931068	-4.91987	-0.481849	0.0124332	0.223636	-0.045107	-0.166282	1.37168	0.0392067	-0.307319	-2.51311	0.103312	0.0746961	-0.0700366	-0.808022
TB147	PI 702622	-0.756478	-0.401856	-9.60954	5.42801	13.6292	-0.3357	-0.303328	-0.132675	-0.308874	-0.0182115	-0.0447802	-0.379101	0.239114	-0.345497	-2.6903	-0.207094	-0.376346	0.0021872	-1.12089
TB148	W6 20108	0.551049	-0.906047	-2.03054	-1.09296	2.51186	-2.24418	-0.0213527	0.166926	-0.00525896	0.535792	0.319199	-0.13317	-0.0358983	1.64799	0.59698	0.133692	0.255871	0.0101251	0.471674
TB149	PI 440809	-0.280979	0.0640835	0.774202	3.91353	2.07881	-2.86821	-0.0920735	0.0334999	-0.5873	-0.107566	-0.153958	-0.172483	-0.0825865	-0.248022	-0.690835	-0.401961	0.591218	-0.0790279	-0.916126
TB150	PI 440810	0.949321	-0.286906	-2.32558	5.46061	-1.03323	0.95649	0.0234227	-0.211645	-0.418516	0.0330246	-0.0156819	0.00225703	-0.0908785	0.12387	-1.54855	0.172815	0.0942828	-0.0252436	-0.911007
TB151	PI 440811	-1.74942	-1.80446	7.96988	-10.3414	-3.82465	-2.07569	4.88074	-0.0104779	0.960913	0.216337	0.960775	1.69391	0.23964	0.847686	-3.18317	3.48585	-0.852818	0.665207	0.220792
TB152	PI 477040	0.221092	0.134027	2.40583	2.17883	2.43886	-1.29376	-0.464039	0.0083815	-0.584596	-0.0675744	-0.0968377	-0.200619	-0.0814419	-0.304888	-2.21629	-0.307311	-0.107334	-0.0671126	-0.980408
TB153	PI 535236	-0.788789	-0.713117	7.99642	1.32312	-0.724968	-1.77755	-0.471165	-0.222722	-0.595895	-0.0680184	-0.155198	-0.34112	-0.0681185	-0.0338405	-1.76877	-0.482205	0.123405	-0.113264	-0.952463
TB154	PI 535237	-1.12654	0.765835	-3.46432	-0.583276	1.30093	7.1606	0.207955	-0.224003	0.393957	-0.0732267	0.209561	0.0726403	0.0287237	-0.34719	-2.3474	-0.0262683	0.106439	0.0412065	-0.946109
TB155	PI 535238	0.256045	-0.0917708	-12.5328	-1.06805	11.1807	5.66163	-0.6124	0.276365	-0.0714503	0.0615563	0.73933	-0.0698267	0.0988106	0.130106	-1.32071	-0.113373	-0.102442	0.0532877	-0.428606
TB156	PI 535239	-1.08296	2.088	-10.1605	7.71197	-0.372762	6.6995	1.64955	-0.140146	0.0890511	0.0849573	0.0185409	-0.675101	-0.0884165	-0.334809	-2.68743	-0.0483469	0.176056	0.022475	-0.939699
TB157	PI 535240	0.0585481	-0.233904	5.70275	1.54379	-1.38888	-1.86347	-0.328567	-0.161734	-0.382338	-0.0557704	-0.157276	-0.257251	-0.0834443	-0.477689	-2.23769	-0.138319	0.242764	-0.111707	0.261165
TB158	PI 535241	-0.123063	-0.280314	3.41543	3.47418	-0.732364	-0.541894	-0.204295	-0.106159	-0.601601	-0.0707076	-0.143038	-0.372639	-0.095328	-0.472442	-1.69155	-0.182846	0.598964	-0.105423	-1.03218
TB159	PI 535242	0.169528	0.358876	0.510399	0.165822	-3.0513	3.95768	-0.518129	0.650967	0.365246	0.035786	-0.0272993	0.0144528	-0.0524045	-0.393138	-0.877668	-0.144308	-0.153255	0.0421214	-0.754891
TB160	PI 535243	-1.14193	2.31215	-10.0186	-5.27964	12.9185	6.5269	0.507611	-0.276425	0.318298	0.269086	0.192383	-0.631867	-0.0765766	-0.0229687	-3.59149	-0.38186	0.882498	-0.069812	-0.378317
TB161	PI 535244	-0.622502	-1.03253	3.03467	9.43891	-3.40809	-0.581353	-0.224658	-0.116683	-0.347167	-0.148629	-0.204349	-0.667568	-0.072291	-0.477053	-2.38384	-0.412128	0.639616	-0.158152	-1.20579
TB162	PI 535245	0.278424	1.33324	-2.11707	7.10775	-4.00504	-1.0547	-0.241989	0.0227071	0.292211	-0.00218739	-0.0434712	-0.2318	0.0841396	-0.0643306	-0.568612	0.741708	-0.34876	-0.0797706	-0.00358794
TB163	PI 535246	-1.19982	0.322878	-2.05906	3.16412	-0.127372	5.65087	0.509603	-0.199681	0.868216	-0.0830588	-0.0528446	-0.434835	-0.0836764	0.0618962	-3.975	-0.113864	0.185737	-0.0292823	-1.01423
TB164	PI 535247	-0.298436	-1.30638	-1.09612	5.6226	1.67066	1.23674	-0.0892343	-0.106931	-0.317576	-0.0495579	-0.0807932	-0.463829	-0.0581441	-0.395775	-2.22863	-0.217793	0.12161	-0.109689	-0.575499
TB165	PI 535248	-0.740928	-0.549754	-12.7497	4.21573	11.7209	4.54164	0.987366	-0.178647	-0.124502	-0.0342949	-0.050443	-0.362764	-0.0832344	0.0226572	-3.43225	-0.175912	0.0545767	0.0195659	-0.877531
TB166	PI 535249	-0.921772	-1.04863	9.1646	5.20762	-4.74762	-5.1192	0.133438	-0.114675	-0.341639	0.0187558	0.0220277	-0.159657	0.283028	0.117735	-2.26141	0.631844	-0.223897	-0.119964	-0.613805
TB167	PI 535250	-1.02916	0.0642758	6.89229	-0.275182	-3.60667	-2.8728	0.198998	0.183998	-0.0254021	0.016022	-0.0290534	0.170029	-0.0938976	-0.0957625	-1.26896	1.23383	0.478071	-0.0316623	-0.278144
TB168	PI 535251	-0.82855	-0.487309	7.0846	1.68298	-1.43828	-3.42291	-0.12357	-0.0411239	-0.510889	-0.0367653	-0.0440314	0.0843533	-0.0934715	-0.21726	-1.99387	-0.253234	0.513167	-0.0600564	0.0594429
TB169	PI 535252	-1.12074	-0.225166	18.4302	-0.322034	-9.1443	-1.86232	0.106124	-0.364621	0.0737812	-0.146856	-0.0696685	-0.186224	-0.101935	-0.618647	-3.07124	-0.603813	-0.534004	-0.027548	-1.29618
TB170	PI 535253	0.47941	-1.45409	-2.32195	3.11877	1.24239	3.53622	-0.236152	0.102985	0.0448988	-0.0495626	-0.0739961	-0.400799	-0.0955078	-0.168706	-0.841824	-0.440774	0.0889493	0.00549998	-0.742004
TB171	PI 535254	0.568224	-1.79626	-0.235211	10.2419	-4.99586	0.0929545	-0.0280663	0.258267	-0.0985684	-0.102789	-0.1231	-0.359161	-0.0377217	-0.165861	-0.342145	-0.184167	-0.134923	-0.0052209	-0.879594
TB172	PI 535255	0.134492	-0.96977	-0.793644	7.65829	-0.601682	0.147947	-0.178793	0.0831223	-0.481841	-0.126994	-0.190848	-0.300669	-0.0408931	-0.157719	-0.561676	-0.346996	-0.409382	-0.0491365	-1.00508
TB173	PI 535256	1.61893	-1.07857	4.86893	3.85911	-5.89806	0.171901	-0.242187	0.408426	-0.265691	-0.0977272	-0.174803	-0.00274687	-0.0659218	-0.457682	-0.711546	-0.212042	-0.0274392	-0.0307536	-0.925586
TB174	PI 535257	-0.325314	-1.56047	15.3021	2.80536	-4.69733	-5.56077	0.0473337	-0.207246	-0.315934	-0.107131	-0.11256	-0.316475	-0.0756041	-0.547862	-2.56102	-0.506365	-0.271196	-0.0912688	-1.08069
TB175	PI 535258	0.557574	-0.563215	-3.29953	5.95045	-0.380761	2.34397	-0.310309	-0.0390284	-0.4361	-0.0151201	-0.0958083	-0.235082	-0.0919772	0.238579	-0.257192	-0.542697	-0.0309793	-0.0685051	-0.72875
TB176	PI 535259	-1.02674	2.43369	-3.28139	3.53044	1.23004	-2.12616	-0.317442	-0.156599	2.11731	-0.0645994	-0.114429	-0.556871	-0.0325865	-0.191364	0.51859	0.481024	0.355059	-0.0934419	-0.86738
TB177	PI 535260	-0.236125	-1.46308	-2.04427	8.56719	-2.81491	-1.82219	-0.278554	0.232093	0.084831	-0.0136663	0.0296235	-0.364489	-0.0426053	-0.0147534	2.39738	-0.459117	-0.013136	-0.0398099	0.10531
TB178	PI 535261	-0.10727	-0.680489	-0.571348	3.73188	3.00603	1.86009	-0.473054	-0.0536956	-0.202282	-0.104801	-0.141862	-0.49008	-0.0881681	-0.372827	-1.63128	-0.491084	-0.322819	-0.111831	-0.922205
TB179	PI 535262	-0.326835	1.58278	6.32032	-0.0643586	-0.641722	0.145229	-0.0177605	-0.100596	-0.658427	-0.102035	-0.188194	-0.319543	-0.0502631	-0.356942	-2.21559	-0.358433	-0.869402	-0.0516235	-0.949784
TB180	PI 535263	-0.0556209	-1.84619	2.16485	4.34794	0.249865	0.36142	-0.12104	0.0441079	-0.0158963	-0.0854847	-0.122383	-0.662484	-0.100069	-0.37031	-1.84442	-0.396761	0.827932	-0.0862523	-0.802522
TB181	PI 535264	-0.280875	-0.537956	16.1099	-0.759833	-3.9599	-5.21754	-0.257945	-0.11521	-0.528664	-0.0611158	-0.144307	-0.204089	-0.0842736	-0.405536	-2.20218	-0.382019	-0.384472	-0.0688013	-1.00636
TB182	PI 535265	-0.369823	-1.81297	-2.27932	2.48644	2.13941	4.33062	-0.270986	-0.0991609	0.29425	-0.0156571	-0.0793057	-0.629815	-0.0904042	-0.0116384	-0.523263	-0.395978	-0.0551639	-0.0626591	-0.523325
TB183	PI 535266	0.0822626	0.0575902	-5.51123	6.05169	3.90096	2.66747	-0.344692	-0.0253665	-0.504981	-0.0873897	-0.13848	-0.397434	-0.0842357	-0.265337	-1.52652	-0.448871	-0.316906	-0.0777085	-0.718294
TB184	PI 535267	-0.522609	0.493521	-7.30304	-1.50736	7.20935	8.86782	-0.188189	-0.206473	-0.147332	-0.106002	-0.0507077	-0.213755	-0.0799783	-0.349679	-2.41023	-0.348174	0.362811	-0.00143836	-0.941914
TB185	PI 535268	-0.160912	-0.774961	-8.0892	6.8892	4.66237	5.61676	-0.370872	-0.138012	-0.27014	-0.104247	-0.102078	-0.531699	-0.0775787	-0.341546	-1.5814	-0.465027	-0.338848	-0.0999479	-0.964699
TB186	PI 535269	-0.307609	0.74627	1.97629	1.17017	2.05522	0.553851	-0.328442	-0.107833	-0.516106	-0.113999	-0.129801	-0.410408	-0.0843629	-0.163977	-1.4817	-0.389441	0.0338636	-0.0777239	-1.02039
TB187	PI 535270	-0.0936837	-0.862364	-0.458187	4.09425	3.09345	-0.970497	0.0636176	-0.0603771	-0.61362	0.0078462	-0.0630261	0.000566733	-0.0886522	-0.0269454	-1.65386	-0.219782	0.130987	-0.0728684	-0.678401
TB188	PI 535373	0.20655	0.531227	-4.37279	4.32268	-6.85418	12.7761	-0.519198	0.271322	-0.24076	-0.0620819	-0.108578	-0.596145	-0.0889938	0.0482336	-2.01505	0.285462	-0.447069	-0.0220137	-0.922891
TB189	PI 535383	-0.883674	1.19164	1.82462	-4.74173	1.01669	2.37548	-0.187363	-0.00190875	1.01584	-0.0821064	-0.108434	0.197267	-0.0668777	-0.224519	-0.0418789	0.0597924	0.111887	0.113191	-0.850174
TB190	PI 638908	-0.259084	-0.572917	-5.37918	4.82294	6.14439	1.58521	-0.278484	0.0495652	-0.446916	-0.106198	-0.127708	-0.346513	-0.0617461	-0.34209	-1.47353	-0.0821769	0.100038	-0.0650959	-0.828027
TB191	PI 638911	-0.924854	0.123937	-6.21378	-3.85166	17.7639	-0.560574	0.302945	0.0903537	-0.413554	-0.107509	-0.103615	-0.378087	-0.060379	-0.0103215	-2.65857	-0.117774	0.370548	-0.114498	-0.919965
TB192	PI 638912	-0.421587	0.052851	-10.0424	7.76931	5.37215	3.47278	0.393546	-0.119647	-0.220442	-0.0981626	-0.0731471	-0.521862	-0.0889607	-0.420556	-1.87617	1.0092	-0.311397	-0.130073	-0.759431
TB193	PI 640947	-0.0334523	-0.408086	-11.0018	0.0270928	7.52615	4.66293	0.89489	-0.126175	-0.584942	-0.0420809	0.215098	-0.253268	0.0310695	-0.10596	1.42175	0.258539	0.763223	0.00812638	-0.65865
TB194	PI 640950	0.526968	-1.63731	-2.79655	5.2836	-2.85196	0.485953	-0.254238	-0.0179697	0.328057	0.167315	0.16687	-0.154588	-0.0785038	0.934696	0.979038	0.0866342	0.01475	-0.0200622	0.537712
TB195	PI 640952	0.202204	-1.40614	-6.15433	-0.777815	-1.25261	8.19065	0.482725	-0.103683	-0.345069	-0.0122624	0.438919	0.0819223	0.0325627	2.79569	0.746847	-0.090468	-0.0529462	0.104783	-0.693917
TB196	PI 640955	-0.19426	-1.62296	4.45497	6.53086	-4.99802	-0.234961	-0.0575017	-0.193502	-0.442591	0.0460831	-0.0327893	0.05563	-0.0875462	-0.220693	-1.25551	-0.494649	0.561239	-0.11028	-0.616963
TB197	PI 640960	0.789758	1.6123	-0.12553	-5.90676	-4.81848	10.2605	0.319898	0.303299	-0.205035	-0.181295	-0.087687	1.20974	-0.0178207	-0.0124777	-2.47743	0.421952	0.367533	0.0737829	-0.852012
TB198	PI 640991	-0.28479	-1.29382	-10.5534	-4.24732	12.3901	8.53027	0.0827839	-0.107016	0.743975	-0.0973314	-0.111598	0.0467065	-0.0544142	-0.173211	-1.06681	-0.195062	0.0273841	-0.0444154	-1.0109
TB199	PI 640993	-0.380076	-0.599489	-3.41101	7.97337	-0.728452	-0.752566	-0.203951	-0.0805011	-0.473939	-0.00724038	-0.00395176	-0.302954	-0.0954945	0.296942	0.907993	0.125958	0.0141123	-0.0643555	-0.183936
TB200	PI 640995	NA	NA	NA	NA	NA	NA	NA	NA	NA	NA	NA	NA	NA	NA	NA	NA	NA	NA	NA
TB201	PI 640996	-1.15201	1.37021	3.82032	3.14317	1.55825	-4.6164	0.0990764	-0.40454	-0.401645	-0.074126	-0.195788	-0.392369	-0.112069	0.320812	-0.480032	-0.554571	0.223177	-0.162495	-0.767498
TB202	PI 642140	-0.478809	-0.967985	-10.4087	-2.28176	12.1309	6.02315	0.893744	-0.228222	-0.708688	-0.021242	0.0251523	-0.0984362	-0.0322311	-0.0480041	-1.03962	-0.137197	0.685745	-0.061225	-0.803922
TB203	PI 653241	-0.502848	5.82221	0.455678	5.98012	-3.23629	-2.99059	-0.317269	0.0292343	-0.32738	-0.0400623	-0.17809	-0.291983	-0.064721	-0.37787	-1.71828	-0.226965	0.373222	-0.101701	-0.843367
TB204	PI 653249	-0.818024	-1.31413	8.54581	1.33475	-0.803113	-4.37341	0.0750409	-0.00102685	-0.510305	-0.0387854	-0.0499101	-0.135526	0.367912	-0.352527	-1.5434	0.00197559	1.00292	-0.106019	-0.748012
TB205	PI 653251	1.20084	-1.30092	-0.747552	-0.8768	7.14122	-1.2114	-0.233537	0.256518	-0.27533	0.0438726	0.134307	0.215894	-0.0582592	-0.422138	-1.6562	-0.359235	-0.0496282	0.00130517	-0.885502
TB206	PI 653252	-0.941743	-1.80604	5.18906	2.20294	1.13829	-2.93868	0.0575212	-0.201251	-0.346927	0.107247	0.057675	0.0289017	-0.0839647	0.0434225	-1.39201	0.0576276	0.547451	-0.0805204	-0.773017
TB207	W6 24877	NA	NA	NA	NA	NA	NA	NA	NA	NA	NA	NA	NA	NA	NA	NA	NA	NA	NA	NA
CK1	Sacaton brown	0.0721893	-0.248163	3.12337	-2.64604	-2.06205	-2.30112	-0.217473	0.139309	0.288174	-0.00353859	0.135783	0.691825	0.0593138	0.855101	2.52521	-0.33432	-0.280707	0.0674406	0.148174
CK2	Sonoran white	0.16782	-0.77486	5.96062	-5.06763	-3.2773	-5.90556	0.27154	0.119057	0.264896	0.207462	0.31941	1.00383	0.0859402	0.710811	4.53952	-0.192684	-0.530625	0.175809	1.81877
CK3	Blue speckled	3.58588	-0.488724	5.84644	-2.58505	0.80992	-3.41463	-0.255843	0.449974	-0.443945	-0.114899	-0.144694	0.631608	0.0781879	-0.277997	-1.9462	-0.0954987	-0.217763	0.0360735	-1.44956
CK4	Black	-0.0615239	-0.354303	15.462	-3.77436	-6.64849	-6.8284	-0.0493699	-0.0737098	0.127847	0.0408762	0.0662741	0.712008	0.0568811	-0.32098	2.2766	-0.372124	-0.417917	0.00165508	0.0522317
