# Supplementary material
Source: Research Square preprint supplement (doi:10.21203/rs.3.rs-8970665/v1)
Supplement: Supplementary file 3 [file 518f39a31dd6354cb23eabc9.xlsx]

## Sheet: Sheet1
Trait	Model	SNP	Chromosome	Position	P.value	MAF	nobs	effect	H&B.P.Value	start	end	width	strand	Gene Name	Annotation
Total Soluble Protein%	BLINK	S08_8796692	Chr08	8796692	1.38e-10	0.365854	205	5.54224	6.82e-06	8788817	8793117	4301	+	Phacu.CVR.008G093700	WNK protein kinase
	BLINK	S08_8796692	Chr08	8796692	1.38e-10	0.365854	205	5.54224	6.82e-06	8795851	8798606	2756	+	Phacu.CVR.008G093800	2-oxoglutarate (2OG) and Fe(II)-dependent oxygenase superfamily protein
	BLINK	S08_8796692	Chr08	8796692	1.38e-10	0.365854	205	5.54224	6.82e-06	8804587	8805088	502	+	Phacu.CVR.008G093900
	BLINK	S01_17593283	Chr01	17593283	2.59e-08	0.368293	205	-4.02197	0.000638921	17592037	17594571	2535	-	Phacu.CVR.001G119800	alpha/beta-Hydrolases superfamily protein
	BLINK	S01_17593283	Chr01	17593283	2.59e-08	0.368293	205	-4.02197	0.000638921	17595859	17602136	6278	-	Phacu.CVR.001G119900	zinc finger (Ran-binding) family protein
	BLINK	S08_8784174	Chr08	8784174	6.95e-07	0.353659	205	0.0605743	0.0114351	8779590	8784378	4789	-	Phacu.CVR.008G093600	(1 of 1) 5.3.1.4 - L-arabinose isomerase
	BLINK	S08_8784174	Chr08	8784174	6.95e-07	0.353659	205	0.0605743	0.0114351	8788817	8793117	4301	+	Phacu.CVR.008G093700	WNK protein kinase
	BLINK	S08_8761065	Chr08	8761065	2.7e-06	0.382927	205	-0.400039	0.0333669	8760570	8766124	5555	-	Phacu.CVR.008G093400	MATE efflux family protein
100-SeedWeight	BLINK	S02_41997902	Chr02	41997902	7.24e-08	0.276224	143	-2.46181	0.00178775	41989598	41993711	4114	-	Phacu.CVR.002G331100	6-phosphogluconate dehydrogenase, decarboxylating
	BLINK	S02_41997902	Chr02	41997902	7.24e-08	0.276224	143	-2.46181	0.00178775	41995918	42000964	5047	-	Phacu.CVR.002G331300	vacuolar H+-ATPase subunit E isoform 3
	BLINK	S02_41997902	Chr02	41997902	7.24e-08	0.276224	143	-2.46181	0.00178775	42004197	42007921	3725	+	Phacu.CVR.002G331400	Galactose mutarotase-like superfamily protein
	BLINK	S01_49536594	Chr01	49536594	7.57e-07	0.367133	143	-1.52896	0.0124593	49513253	49532207	18955	+	Phacu.CVR.001G230400	CTR1-like protein kinase, putative, expressed
	BLINK	S01_49536594	Chr01	49536594	7.57e-07	0.367133	143	-1.52896	0.0124593	49535924	49542323	6400	+	Phacu.CVR.001G230600	ENTH/VHS family protein; ZOS9-20 - C2H2 zinc finger protein, expressed
Seed Width	FARMCPU	S07_13428624	Chr07	13428624	3.16e-12	0.429577	142	-0.0797698	1.56e-07	13427195	13430142	2948	-	Phacu.CVR.007G121900	indole-3-acetic acid inducible 14; OsIAA30 - Auxin-responsive Aux/IAA gene family member, expressed
	FARMCPU	S01_17629015	Chr01	17629015	2.2e-08	0.417254	142	-0.0382021	0.000362509	17630168	17630783	616	-	Phacu.CVR.001G120100
	FARMCPU	S08_46951004	Chr08	46951004	4.4e-08	0.323944	142	-0.037986	0.000543651	46945580	46951108	5529	-	Phacu.CVR.008G266400	Protein of unknown function (DUF630 and DUF632)
	FARMCPU	S08_46951004	Chr08	46951004	4.4e-08	0.323944	142	-0.037986	0.000543651	46959323	46960725	1403	-	Phacu.CVR.008G266500
	FARMCPU	S08_2123448	Chr08	2123448	1.86e-07	0.352113	142	-0.0329983	0.00183431	2109023	2122344	13322	+	Phacu.CVR.008G025600	SMAD/FHA domain-containing protein
	FARMCPU	S08_2123448	Chr08	2123448	1.86e-07	0.352113	142	-0.0329983	0.00183431	2123122	2137937	14816	-	Phacu.CVR.008G025700	DNA/RNA polymerases superfamily protein
METHIONINE	BLINK	S02_10429456	Chr02	10429456	6.85e-07	0.0544554	202	-0.123748	0.0338301	10427485	10429871	2387	+	Phacu.CVR.002G092500	TEOSINTE BRANCHED, cycloidea and PCF (TCP) 14
THREONINE	BLINK	S08_49548543	Chr08	49548543	6.95e-10	0.0792079	202	0.346321	3.43e-05	49537857	49542082	4226	+	Phacu.CVR.008G290800	NA
	BLINK	S08_49548543	Chr08	49548543	6.95e-10	0.0792079	202	0.346321	3.43e-05	49541767	49545925	4159	+	Phacu.CVR.008G290900	mitochondrial carrier protein, putative, expressed
	BLINK	S08_49548543	Chr08	49548543	6.95e-10	0.0792079	202	0.346321	3.43e-05	49546777	49551704	4928	-	Phacu.CVR.008G291000	LIM domain-containing protein, putative, expressed
	BLINK	S08_49548543	Chr08	49548543	6.95e-10	0.0792079	202	0.346321	3.43e-05	49557896	49562237	4342	+	Phacu.CVR.008G291100	Ser/Thr protein phosphatase family protein, putative, expressed
	BLINK	S06_14126029	Chr06	14126029	3.99e-08	0.183168	202	-0.245362	0.00098534	14123471	14130581	7111	+	Phacu.CVR.006G045800	sucrose-phosphate synthase, putative, expressed
	BLINK	S04_51739891	Chr04	51739891	1.4e-07	0.143564	202	-0.211415	0.00230411	51737955	51743404	5450	-	Phacu.CVR.004G148800	cytochrome P450, putative, expressed
	BLINK	S04_51739891	Chr04	51739891	1.4e-07	0.143564	202	-0.211415	0.00230411	51747607	51749759	2153	-	Phacu.CVR.004G148900	cytochrome P450, putative, expressed
	BLINK	S02_5914294	Chr02	5914294	2.21e-07	0.0495049	202	0.348965	0.00272579	5907492	5909451	1960	+	Phacu.CVR.002G063900	metalloendoproteinase 1 precursor, putative, expressed
	BLINK	S02_5914294	Chr02	5914294	2.21e-07	0.0495049	202	0.348965	0.00272579	5910656	5912581	1926	-	Phacu.CVR.002G064000	Pentatricopeptide repeat (PPR) superfamily protein
	BLINK	S02_5914294	Chr02	5914294	2.21e-07	0.0495049	202	0.348965	0.00272579	5913163	5916497	3335	+	Phacu.CVR.002G064100	integral membrane protein DUF6 domain containing protein, expressed
	BLINK	S02_5914294	Chr02	5914294	2.21e-07	0.0495049	202	0.348965	0.00272579	5922185	5927212	5028	-	Phacu.CVR.002G064200	Ubiquitin-like superfamily protein
	BLINK	S08_52080067	Chr08	52080067	6.22e-07	0.108911	202	-0.253232	0.0061461	52072648	52075051	2404	+	Phacu.CVR.008G318200
	BLINK	S08_52080067	Chr08	52080067	6.22e-07	0.108911	202	-0.253232	0.0061461	52077918	52083740	5823	+	Phacu.CVR.008G318300	expressed protein
	BLINK	S08_52080067	Chr08	52080067	6.22e-07	0.108911	202	-0.253232	0.0061461	52082064	52087504	5441	+	Phacu.CVR.008G318400	Ubiquitin-specific protease family C19-related protein
ASPARAGINE	BLINK	S08_2589341	Chr08	2589341	6.74e-09	0.485149	202	-1.40571	0.000332637	2582227	2585180	2954	-	Phacu.CVR.008G032300	PLC-like phosphodiesterases superfamily protein
	BLINK	S08_2589341	Chr08	2589341	6.74e-09	0.485149	202	-1.40571	0.000332637	2588296	2595485	7190	-	Phacu.CVR.008G032400	NB-ARC domain-containing disease resistance protein
	BLINK	S08_2589341	Chr08	2589341	6.74e-09	0.485149	202	-1.40571	0.000332637	2588486	2589484	999	+	Phacu.CVR.008G032500
	BLINK	S08_2589341	Chr08	2589341	6.74e-09	0.485149	202	-1.40571	0.000332637	2598327	2599991	1665	+	Phacu.CVR.008G032600
	BLINK	S03_34763303	Chr03	34763303	2.37e-08	0.230198	202	-1.77323	0.000389748	34751127	34753457	2331	-	Phacu.CVR.003G256000	OsSub44 - Putative Subtilisin homologue, expressed
	BLINK	S03_34763303	Chr03	34763303	2.37e-08	0.230198	202	-1.77323	0.000389748	34759977	34764486	4510	+	Phacu.CVR.003G256100	tetratricopeptide repeat domain containing protein, expressed
	BLINK	S06_28300143	Chr06	28300143	2.18e-08	0.0495049	202	2.80507	0.000389748	28297342	28300505	3164	+	Phacu.CVR.006G197800	(1 of 5) 2.3.1.43 - Phosphatidylcholine--sterol O-acyltransferase / Phospholipid--cholesterol acyltransferase
	BLINK	S06_28300143	Chr06	28300143	2.18e-08	0.0495049	202	2.80507	0.000389748	28304818	28306956	2139	+	Phacu.CVR.006G197900	(1 of 5) 2.3.1.43 - Phosphatidylcholine--sterol O-acyltransferase / Phospholipid--cholesterol acyltransferase
	BLINK	S06_29581511	Chr06	29581511	7.13e-07	0.113861	202	-1.63184	0.00857809	29572806	29574884	2079	-	Phacu.CVR.006G212400	dof zinc finger domain containing protein, putative, expressed
	BLINK	S06_29581511	Chr06	29581511	7.13e-07	0.113861	202	-1.63184	0.00857809	29580949	29582282	1334	-	Phacu.CVR.006G212500	late embryogenesis abundant protein, group 3, putative, expressed
	BLINK	S06_29581511	Chr06	29581511	7.13e-07	0.113861	202	-1.63184	0.00857809	29584349	29587547	3199	-	Phacu.CVR.006G212600	40S ribosomal protein S6, putative, expressed
	BLINK	S06_29581511	Chr06	29581511	7.13e-07	0.113861	202	-1.63184	0.00857809	29589526	29592369	2844	-	Phacu.CVR.006G212700	VQ domain containing protein, putative, expressed
	BLINK	S09_28269194	Chr09	28269194	8.69e-07	0.0866337	202	2.88761	0.00857809	28255016	28273512	18497	+	Phacu.CVR.009G221000	pantothenate kinase, putative, expressed
	BLINK	S09_28269194	Chr09	28269194	8.69e-07	0.0866337	202	2.88761	0.00857809	28278351	28280675	2325	-	Phacu.CVR.009G221100	dof zinc finger domain containing protein, putative, expressed
ALANINE	BLINK	S07_913973	Chr07	913973	2.77e-10	0.0792079	202	-0.934554	1.37e-05	901855	907478	5624	-	Phacu.CVR.007G011600	(1 of 1) K11373 - elongator complex protein 1 (ELP1, IKI3, IKBKAP)
	BLINK	S07_913973	Chr07	913973	2.77e-10	0.0792079	202	-0.934554	1.37e-05	909396	916333	6938	+	Phacu.CVR.007G011700	methionyl-tRNA synthetase / methionine--tRNA ligase / MetRS (cpMetRS)
	BLINK	S07_913973	Chr07	913973	2.77e-10	0.0792079	202	-0.934554	1.37e-05	920159	921712	1554	-	Phacu.CVR.007G011800	membrane associated DUF588 domain containing protein, putative, expressed
	BLINK	S05_26254415	Chr05	26254415	8.34e-10	0.190594	202	-0.389366	2.06e-05	26253972	26255012	1041	+	Phacu.CVR.005G120400
	BLINK	S02_25433824	Chr02	25433824	1.4e-09	0.465347	202	0.353069	2.3e-05	25424141	25425438	1298	-	Phacu.CVR.002G179900	homolog of Synechocystis YCF37
	BLINK	S02_25433824	Chr02	25433824	1.4e-09	0.465347	202	0.353069	2.3e-05	25424327	25428902	4576	+	Phacu.CVR.002G180000	Tetratricopeptide repeat (TPR)-like superfamily protein
	BLINK	S02_25433824	Chr02	25433824	1.4e-09	0.465347	202	0.353069	2.3e-05	25429891	25430216	326	+	Phacu.CVR.002G180100
	BLINK	S02_25433824	Chr02	25433824	1.4e-09	0.465347	202	0.353069	2.3e-05	25432688	25435481	2794	+	Phacu.CVR.002G180200	BTBN10 - Bric-a-Brac, Tramtrack, Broad Complex BTB domain with non-phototropic hypocotyl 3 NPH3 and coiled-coil domains, expressed
	BLINK	S02_14593495	Chr02	14593495	7.49e-09	0.386139	202	1.14036	9.25e-05	14593023	14596119	3097	+	Phacu.CVR.002G112800	(1 of 2) 2.5.1.3 - Thiamine-phosphate diphosphorylase / TMP pyrophosphorylase
	BLINK	S04_1353940	Chr04	1353940	7.1e-07	0.207921	202	-0.245695	0.00701002	1340696	1346362	5667	-	Phacu.CVR.004G012900	disease resistance RPP13-like protein 1, putative, expressed
	BLINK	S04_1353940	Chr04	1353940	7.1e-07	0.207921	202	-0.245695	0.00701002	1350607	1354083	3477	-	Phacu.CVR.004G013000
	BLINK	S04_1353940	Chr04	1353940	7.1e-07	0.207921	202	-0.245695	0.00701002	1357625	1357921	297	-	Phacu.CVR.004G013100
	BLINK	S04_1353940	Chr04	1353940	7.1e-07	0.207921	202	-0.245695	0.00701002	1359102	1363529	4428	-	Phacu.CVR.004G013200	disease resistance RPP13-like protein 1, putative, expressed
ALLANTOIN	BLINK	S06_11509797	Chr06	11509797	3.29e-10	0.0594059	202	-0.875571	1.62e-05	11509010	11509333	324	-	Phacu.CVR.006G031700
	BLINK	S09_4094688	Chr09	4094688	2.64e-09	0.0965347	202	-0.659375	6.53e-05	4093937	4095514	1578	-	Phacu.CVR.009G043900	ARM repeat superfamily protein
	BLINK	S09_4094688	Chr09	4094688	2.64e-09	0.0965347	202	-0.659375	6.53e-05	4097644	4105596	7953	-	Phacu.CVR.009G044000	(1 of 1) PTHR21573:SF0 - ER MEMBRANE PROTEIN COMPLEX SUBUNIT 1
	BLINK	S03_39866868	Chr03	39866868	4.94e-09	0.116337	202	-0.814111	8.13e-05	39840074	39868312	28239	+	Phacu.CVR.003G299200
	BLINK	S03_39866868	Chr03	39866868	4.94e-09	0.116337	202	-0.814111	8.13e-05	39870373	39870678	306	+	Phacu.CVR.003G299300
	BLINK	S05_26170487	Chr05	26170487	7.78e-09	0.0569307	202	-1.65671	9.61e-05	26169880	26171481	1602	-	Phacu.CVR.005G119300	transferase family protein, putative, expressed
	BLINK	S05_26170487	Chr05	26170487	7.78e-09	0.0569307	202	-1.65671	9.61e-05	26175561	26178185	2625	-	Phacu.CVR.005G119400	Pentatricopeptide repeat (PPR) superfamily protein
	BLINK	S05_26170487	Chr05	26170487	7.78e-09	0.0569307	202	-1.65671	9.61e-05	26177057	26187563	10507	-	Phacu.CVR.005G119500
	BLINK	S02_45076749	Chr02	45076749	5.45e-08	0.165842	202	-0.487863	0.000448589	45065805	45068185	2381	-	Phacu.CVR.002G369300	purple acid phosphatase 17
	BLINK	S02_45076749	Chr02	45076749	5.45e-08	0.165842	202	-0.487863	0.000448589	45070452	45074433	3982	-	Phacu.CVR.002G369400	annexin 5
	BLINK	S02_45076749	Chr02	45076749	5.45e-08	0.165842	202	-0.487863	0.000448589	45073834	45077793	3960	+	Phacu.CVR.002G369500	monoglyceride lipase, putative, expressed
	BLINK	S02_45076749	Chr02	45076749	5.45e-08	0.165842	202	-0.487863	0.000448589	45079765	45080733	969	-	Phacu.CVR.002G369600
	BLINK	S10_37572530	Chr10	37572530	4.69e-08	0.0742574	202	-0.82952	0.000448589	37566937	37571118	4182	+	Phacu.CVR.010G159100	Disease resistance protein (TIR-NBS-LRR class) family
	BLINK	S10_37572530	Chr10	37572530	4.69e-08	0.0742574	202	-0.82952	0.000448589	37571635	37576353	4719	-	Phacu.CVR.010G159200	Disease resistance protein (TIR-NBS-LRR class) family
	BLINK	S03_479738	Chr03	479738	6.37e-08	0.0470297	202	-0.799406	0.000449218	470233	471698	1466	+	Phacu.CVR.003G004700	expressed protein
	BLINK	S03_479738	Chr03	479738	6.37e-08	0.0470297	202	-0.799406	0.000449218	473730	479312	5583	-	Phacu.CVR.003G004800	OsMADS29 - MADS-box family gene with MIKCc type-box, expressed
	BLINK	S03_479738	Chr03	479738	6.37e-08	0.0470297	202	-0.799406	0.000449218	484624	488424	3801	+	Phacu.CVR.003G004900	elongation factor Tu family protein, putative, expressed
	BLINK	S07_8445702	Chr07	8445702	1.16e-07	0.410891	202	-0.90998	0.000713987	8444244	8448322	4079	-	Phacu.CVR.007G089000	pentatricopeptide repeat-containing protein, putative, expressed
	BLINK	S07_8445702	Chr07	8445702	1.16e-07	0.410891	202	-0.90998	0.000713987	8448045	8458331	10287	-	Phacu.CVR.007G089100
GLUTAMINE	BLINK	S09_37434888	Chr09	37434888	1.39e-19	0.0495049	202	-0.724845	6.87e-15	37427094	37429504	2411	+	Phacu.CVR.009G294200	peroxidase precursor, putative, expressed
	BLINK	S09_37434888	Chr09	37434888	1.39e-19	0.0495049	202	-0.724845	6.87e-15	37434602	37438398	3797	-	Phacu.CVR.009G294300	NA
	BLINK	S02_22532535	Chr02	22532535	1.24e-18	0.0594059	202	-0.543632	3.06e-14	22518668	22523905	5238	+	Phacu.CVR.002G154900	CPuORF21 - conserved peptide uORF-containing transcript, expressed
	BLINK	S02_22532535	Chr02	22532535	1.24e-18	0.0594059	202	-0.543632	3.06e-14	22531823	22539279	7457	-	Phacu.CVR.002G155000	DZC (Disease resistance/zinc finger/chromosome condensation-like region) domain containing protein
	BLINK	S02_22532535	Chr02	22532535	1.24e-18	0.0594059	202	-0.543632	3.06e-14	22539060	22539511	452	+	Phacu.CVR.002G155200	NA
	BLINK	S08_55019079	Chr08	55019079	4.29e-14	0.138614	202	0.370831	7.07e-10	55011720	55018957	7238	-	Phacu.CVR.008G357300	BR-signaling kinase 1; protein kinase family protein, putative, expressed
	BLINK	S08_55019079	Chr08	55019079	4.29e-14	0.138614	202	0.370831	7.07e-10	55022479	55027997	5519	-	Phacu.CVR.008G357400	DUF630/DUF632 domains containing protein, putative, expressed
	BLINK	S07_4991771	Chr07	4991771	4.22e-11	0.0495049	202	-0.356574	5.2e-07	4977508	4983163	5656	+	Phacu.CVR.007G061000	D-aminoacid aminotransferase-like PLP-dependent enzymes superfamily protein
	BLINK	S07_4991771	Chr07	4991771	4.22e-11	0.0495049	202	-0.356574	5.2e-07	4990276	4994310	4035	+	Phacu.CVR.007G061100	STE_PAK_Ste20_Slob_Wnk.4 - STE kinases include homologs to sterile 7, sterile 11 and sterile 20 from yeast, expressed
	BLINK	S07_4991771	Chr07	4991771	4.22e-11	0.0495049	202	-0.356574	5.2e-07	4998463	5000823	2361	+	Phacu.CVR.007G061200	pentatricopeptide (PPR) repeat-containing protein
	BLINK	S07_35886565	Chr07	35886565	1.11e-07	0.0940594	202	0.276952	0.00109487	35881857	35884371	2515	-	Phacu.CVR.007G237300	pectinesterase, putative, expressed
	BLINK	S07_35886565	Chr07	35886565	1.11e-07	0.0940594	202	0.276952	0.00109487	35885412	35887310	1899	-	Phacu.CVR.007G237400	NA
	BLINK	S07_35886565	Chr07	35886565	1.11e-07	0.0940594	202	0.276952	0.00109487	35892440	35896976	4537	-	Phacu.CVR.007G237500	Protein of unknown function (DUF1399)
	BLINK	S09_4094430	Chr09	4094430	1.97e-07	0.0495049	202	-0.288703	0.00161995	4093937	4095514	1578	-	Phacu.CVR.009G043900	ARM repeat superfamily protein
	BLINK	S09_4094430	Chr09	4094430	1.97e-07	0.0495049	202	-0.288703	0.00161995	4097644	4105596	7953	-	Phacu.CVR.009G044000	(1 of 1) PTHR21573:SF0 - ER MEMBRANE PROTEIN COMPLEX SUBUNIT 1
	BLINK	S01_54966882	Chr01	54966882	3.03e-07	0.0569307	202	-0.258491	0.00213942	54957137	54960233	3097	-	Phacu.CVR.001G291300	Cyclophilin-like peptidyl-prolyl cis-trans isomerase family protein
	BLINK	S01_54966882	Chr01	54966882	3.03e-07	0.0569307	202	-0.258491	0.00213942	54965069	54970599	5531	+	Phacu.CVR.001G291400	(1 of 1) K05857 - phosphatidylinositol phospholipase C, delta (PLCD)
	BLINK	S01_54966882	Chr01	54966882	3.03e-07	0.0569307	202	-0.258491	0.00213942	54972812	54979564	6753	+	Phacu.CVR.001G291500	(1 of 1) K05857 - phosphatidylinositol phospholipase C, delta (PLCD)
	BLINK	S05_4183165	Chr05	4183165	3.47e-07	0.0717822	202	0.254248	0.0021397	4181748	4183947	2200	+	Phacu.CVR.005G040600	ATPase, putative, expressed
	BLINK	S05_4183165	Chr05	4183165	3.47e-07	0.0717822	202	0.254248	0.0021397	4188333	4192731	4399	+	Phacu.CVR.005G040700
	BLINK	S07_23156701	Chr07	23156701	2.82e-06	0.492574	202	-0.15848	0.0154976	23143472	23147893	4422	+	Phacu.CVR.007G152500
	BLINK	S07_23156701	Chr07	23156701	2.82e-06	0.492574	202	-0.15848	0.0154976	23156215	23157532	1318	+	Phacu.CVR.007G152600
GLYCINE	BLINK	S05_36056350	Chr05	36056350	7.59e-09	0.0816832	202	-0.233241	0.000374965	36043845	36047559	3715	+	Phacu.CVR.005G209400	(1 of 1) PTHR33427:SF2 - GENOMIC DNA, CHROMOSOME 3, P1 CLONE:MQD17
	BLINK	S05_36056350	Chr05	36056350	7.59e-09	0.0816832	202	-0.233241	0.000374965	36047664	36050888	3225	-	Phacu.CVR.005G209500	phototropic-responsive NPH3 family protein, putative, expressed
	BLINK	S05_36056350	Chr05	36056350	7.59e-09	0.0816832	202	-0.233241	0.000374965	36052882	36056758	3877	-	Phacu.CVR.005G209600	plastidic ATP/ADP-transporter, putative, expressed
HISTIDINE	BLINK	S10_34008751	Chr10	34008751	3.1e-11	0.0717822	202	-1.07598	1.53e-06	34003363	34008648	5286	-	Phacu.CVR.010G131500	BCL-2-associated athanogene 6
	BLINK	S06_31227868	Chr06	31227868	1.7e-08	0.0495049	202	-0.398834	0.0004198	31225630	31229084	3455	+	Phacu.CVR.006G236200	2-nitropropane dioxygenase family, putative, expressed
	BLINK	S06_31227868	Chr06	31227868	1.7e-08	0.0495049	202	-0.398834	0.0004198	31229050	31231079	2030	-	Phacu.CVR.006G236300	(1 of 1) PTHR11926//PTHR11926:SF16 - GLUCOSYL/GLUCURONOSYL TRANSFERASES // PROTEIN UGT-61-RELATED
	BLINK	S06_31227868	Chr06	31227868	1.7e-08	0.0495049	202	-0.398834	0.0004198	31231792	31234231	2440	-	Phacu.CVR.006G236400	(1 of 1) PTHR11926//PTHR11926:SF16 - GLUCOSYL/GLUCURONOSYL TRANSFERASES // PROTEIN UGT-61-RELATED
	BLINK	S06_31227868	Chr06	31227868	1.7e-08	0.0495049	202	-0.398834	0.0004198	31236662	31238864	2203	-	Phacu.CVR.006G236500	(1 of 1) PTHR11926//PTHR11926:SF16 - GLUCOSYL/GLUCURONOSYL TRANSFERASES // PROTEIN UGT-61-RELATED
ISOLEUCINE	BLINK	S06_24430243	Chr06	24430243	2.56e-09	0.0618812	202	-0.1259	0.000126668	24415983	24421272	5290	-	Phacu.CVR.006G153600	NA
	BLINK	S06_24430243	Chr06	24430243	2.56e-09	0.0618812	202	-0.1259	0.000126668	24425471	24432539	7069	+	Phacu.CVR.006G153700	putative type 1 membrane protein
	BLINK	S06_24430243	Chr06	24430243	2.56e-09	0.0618812	202	-0.1259	0.000126668	24433929	24437685	3757	+	Phacu.CVR.006G153800	ABA Overly-Sensitive 5; expressed protein
	BLINK	S06_24430243	Chr06	24430243	2.56e-09	0.0618812	202	-0.1259	0.000126668	24439024	24444152	5129	-	Phacu.CVR.006G153900	histidinol dehydrogenase, chloroplast precursor, putative, expressed
	BLINK	S08_5080666	Chr08	5080666	3.03e-08	0.0693069	202	-0.102912	0.000748221	5075861	5078202	2342	-	Phacu.CVR.008G059000	ZOS6-10 - C2H2 zinc finger protein, expressed
	BLINK	S08_5080666	Chr08	5080666	3.03e-08	0.0693069	202	-0.102912	0.000748221	5080507	5083440	2934	-	Phacu.CVR.008G059100	NA
	BLINK	S07_30438111	Chr07	30438111	5.21e-08	0.0742574	202	-0.0971258	0.000858193	30435006	30438439	3434	+	Phacu.CVR.007G191300	Pentatricopeptide repeat (PPR) superfamily protein
	BLINK	S07_30438111	Chr07	30438111	5.21e-08	0.0742574	202	-0.0971258	0.000858193	30441344	30442900	1557	-	Phacu.CVR.007G191400	actin-depolymerizing factor, putative, expressed
	BLINK	S09_35468167	Chr09	35468167	1.6e-07	0.111386	202	-0.0782663	0.00197288	35465194	35468733	3540	+	Phacu.CVR.009G277500	Plant invertase/pectin methylesterase inhibitor superfamily
	BLINK	S08_48723492	Chr08	48723492	1.66e-06	0.143564	202	-0.0994825	0.0164052	48714719	48716804	2086	-	Phacu.CVR.008G284100	40S ribosomal protein S26, putative, expressed
	BLINK	S08_48723492	Chr08	48723492	1.66e-06	0.143564	202	-0.0994825	0.0164052	48721648	48724811	3164	-	Phacu.CVR.008G284200	zinc finger family protein, putative, expressed
LEUCINE	BLINK	S03_22163227	Chr03	22163227	1.45e-10	0.14604	202	-0.191399	7.18e-06	22162884	22165696	2813	+	Phacu.CVR.003G152400	protein kinase APK1B, chloroplast precursor, putative, expressed
LYSINE	BLINK	S07_22884181	Chr07	22884181	4.97e-07	0.0569307	202	-0.313817	0.0107776	22882682	22890710	8029	+	Phacu.CVR.007G151500	NA
	BLINK	S11_10209988	Chr11	10209988	6.55e-07	0.0594059	202	0.267736	0.0107776	10203551	10208106	4556	+	Phacu.CVR.011G105200	S-adenosyl-L-methionine-dependent methyltransferases superfamily protein
	BLINK	S11_10209988	Chr11	10209988	6.55e-07	0.0594059	202	0.267736	0.0107776	10208356	10211264	2909	-	Phacu.CVR.011G105300	NA
	BLINK	S04_6376564	Chr04	6376564	1e-06	0.311881	202	0.422071	0.0124008	6374038	6376770	2733	-	Phacu.CVR.004G052100	WUSCHEL related homeobox 11; expressed
PROLINE	BLINK	S06_24430243	Chr06	24430243	7.58e-09	0.0618812	202	-2.42111	0.000374224	24415983	24421272	5290	-	Phacu.CVR.006G153600	NA
	BLINK	S06_24430243	Chr06	24430243	7.58e-09	0.0618812	202	-2.42111	0.000374224	24425471	24432539	7069	+	Phacu.CVR.006G153700	putative type 1 membrane protein; expressed protein
	BLINK	S06_24430243	Chr06	24430243	7.58e-09	0.0618812	202	-2.42111	0.000374224	24433929	24437685	3757	+	Phacu.CVR.006G153800	ABA Overly-Sensitive 5; expressed protein
	BLINK	S06_24430243	Chr06	24430243	7.58e-09	0.0618812	202	-2.42111	0.000374224	24439024	24444152	5129	-	Phacu.CVR.006G153900	histidinol dehydrogenase, chloroplast precursor, putative, expressed
	BLINK	S08_44313022	Chr08	44313022	3.22e-08	0.0792079	202	-1.89719	0.000397889	44302067	44306140	4074	+	Phacu.CVR.008G242800	(1 of 1) K04345 - protein kinase A (PKA)
	BLINK	S08_44313022	Chr08	44313022	3.22e-08	0.0792079	202	-1.89719	0.000397889	44307027	44308703	1677	-	Phacu.CVR.008G242900	Proton/phosphate symporter
	BLINK	S08_44313022	Chr08	44313022	3.22e-08	0.0792079	202	-1.89719	0.000397889	44311940	44316273	4334	-	Phacu.CVR.008G243000	Protein tyrosine kinase
	BLINK	S08_54580942	Chr08	54580942	3.03e-08	0.383663	202	1.48037	0.000397889	54569178	54572813	3636	+	Phacu.CVR.008G351300	Sterile alpha motif (SAM) domain-containing protein
	BLINK	S08_54580942	Chr08	54580942	3.03e-08	0.383663	202	1.48037	0.000397889	54574786	54581613	6828	+	Phacu.CVR.008G351400	nucleoporin, putative, expressed
	BLINK	S08_54580942	Chr08	54580942	3.03e-08	0.383663	202	1.48037	0.000397889	54584540	54588454	3915	+	Phacu.CVR.008G351500	NA
	BLINK	S08_54580942	Chr08	54580942	3.03e-08	0.383663	202	1.48037	0.000397889	54590850	54592731	1882	+	Phacu.CVR.008G351600	chlorophyll A-B binding protein, putative, expressed
	BLINK	S11_24609921	Chr11	24609921	2.57e-08	0.106436	202	-2.48773	0.000397889	24613863	24616379	2517	-	Phacu.CVR.011G138900
	BLINK	S02_602361	Chr02	602361	1.87e-07	0.39604	202	3.49186	0.00184436	590667	592481	1815	-	Phacu.CVR.002G007300	(1 of 1) PTHR33312:SF5 - MEMBRANE-ASSOCIATED KINASE REGULATOR 1-RELATED
	BLINK	S02_602361	Chr02	602361	1.87e-07	0.39604	202	3.49186	0.00184436	599654	607756	8103	+	Phacu.CVR.002G007400	T-type cyclin
	BLINK	S02_602361	Chr02	602361	1.87e-07	0.39604	202	3.49186	0.00184436	609069	618855	9787	+	Phacu.CVR.002G007500	chloride channel protein CLC-d, putative, expressed
	BLINK	S06_19797385	Chr06	19797385	4.24e-07	0.0717822	202	-1.69768	0.00234707	19785161	19788698	3538	+	Phacu.CVR.006G096800	Eukaryotic translation initiation factor 2 subunit 1, eIF2-alpha subunit
	BLINK	S06_19797385	Chr06	19797385	4.24e-07	0.0717822	202	-1.69768	0.00234707	19793245	19794702	1458	+	Phacu.CVR.006G096900	peroxidase precursor, putative, expressed
	BLINK	S06_19797385	Chr06	19797385	4.24e-07	0.0717822	202	-1.69768	0.00234707	19796691	19798454	1764	-	Phacu.CVR.006G097000	peroxidase precursor, putative, expressed
	BLINK	S06_19797385	Chr06	19797385	4.24e-07	0.0717822	202	-1.69768	0.00234707	19805156	19806818	1663	-	Phacu.CVR.006G097100	peroxidase precursor, putative, expressed
	BLINK	S06_24815182	Chr06	24815182	4.75e-07	0.0990099	202	-1.72334	0.00234707	24810894	24811895	1002	+	Phacu.CVR.006G157200	invertase/pectin methylesterase inhibitor family protein, putative, expressed
	BLINK	S06_24815182	Chr06	24815182	4.75e-07	0.0990099	202	-1.72334	0.00234707	24814735	24815872	1138	-	Phacu.CVR.006G157300	invertase/pectin methylesterase inhibitor family protein, putative, expressed
	BLINK	S06_24815182	Chr06	24815182	4.75e-07	0.0990099	202	-1.72334	0.00234707	24818437	24820429	1993	-	Phacu.CVR.006G157400	decarboxylase, putative, expressed
	BLINK	S06_26088057	Chr06	26088057	4.3e-07	0.190594	202	-1.70105	0.00234707	26087416	26089527	2112	+	Phacu.CVR.006G172500	expressed protein
	BLINK	S06_26088057	Chr06	26088057	4.3e-07	0.190594	202	-1.70105	0.00234707	26092720	26098853	6134	+	Phacu.CVR.006G172600	AAA-type ATPase family protein, putative, expressed
	BLINK	S08_44379295	Chr08	44379295	4.36e-07	0.0767327	202	-1.76319	0.00234707	44388233	44390711	2479	-	Phacu.CVR.008G243500	Calcium-dependent lipid-binding (CaLB domain) family protein
	BLINK	S09_13294076	Chr09	13294076	3.34e-07	0.20297	202	-1.43345	0.00234707	13284265	13284642	378	-	Phacu.CVR.009G121300	NA
	BLINK	S09_13294076	Chr09	13294076	3.34e-07	0.20297	202	-1.43345	0.00234707	13285764	13294781	9018	-	Phacu.CVR.009G121600	Spc97 / Spc98 family protein, putative, expressed
	BLINK	S09_13294076	Chr09	13294076	3.34e-07	0.20297	202	-1.43345	0.00234707	13295331	13303012	7682	-	Phacu.CVR.009G121700	NA
	BLINK	S09_2566195	Chr09	2566195	5.35e-07	0.393564	202	1.28757	0.00239976	2555429	2557687	2259	+	Phacu.CVR.009G028800	(1 of 1) PF03140//PF05903 - Plant protein of unknown function (DUF247) // PPPDE putative peptidase domain (Peptidase_C97)
	BLINK	S09_2566195	Chr09	2566195	5.35e-07	0.393564	202	1.28757	0.00239976	2564902	2566155	1254	+	Phacu.CVR.009G028900	(1 of 1) PF03140//PF05903 - Plant protein of unknown function (DUF247) // PPPDE putative peptidase domain (Peptidase_C97)
	BLINK	S09_2566195	Chr09	2566195	5.35e-07	0.393564	202	1.28757	0.00239976	2569362	2571224	1863	+	Phacu.CVR.009G029000	(1 of 1) PF03140//PF05903 - Plant protein of unknown function (DUF247) // PPPDE putative peptidase domain (Peptidase_C97)
	BLINK	S09_2566195	Chr09	2566195	5.35e-07	0.393564	202	1.28757	0.00239976	2572819	2573945	1127	+	Phacu.CVR.009G029100
SERINE	BLINK	S06_31490361	Chr06	31490361	1.99e-08	0.0866337	202	-0.623288	0.000490983	31475140	31481920	6781	+	Phacu.CVR.006G239100	beta-D-xylosidase, putative, expressed
	BLINK	S06_31490361	Chr06	31490361	1.99e-08	0.0866337	202	-0.623288	0.000490983	31480093	31481983	1891	-	Phacu.CVR.006G239200	NA
	BLINK	S06_31490361	Chr06	31490361	1.99e-08	0.0866337	202	-0.623288	0.000490983	31484316	31486092	1777	-	Phacu.CVR.006G239300	NA
	BLINK	S06_31490361	Chr06	31490361	1.99e-08	0.0866337	202	-0.623288	0.000490983	31488760	31490555	1796	-	Phacu.CVR.006G239400	(1 of 1) PTHR11926//PTHR11926:SF16 - GLUCOSYL/GLUCURONOSYL TRANSFERASES // PROTEIN UGT-61-RELATED
	BLINK	S06_31490361	Chr06	31490361	1.99e-08	0.0866337	202	-0.623288	0.000490983	31496827	31498390	1564	+	Phacu.CVR.006G239500	no apical meristem protein, putative, expressed
	BLINK	S08_635772	Chr08	635772	1.24e-08	0.111386	202	-0.404614	0.000490983	634602	639107	4506	-	Phacu.CVR.008G006100	auxin-induced protein 5NG4, putative, expressed
	BLINK	S08_635772	Chr08	635772	1.24e-08	0.111386	202	-0.404614	0.000490983	644254	646699	2446	-	Phacu.CVR.008G006200	expressed protein
	BLINK	S06_31007408	Chr06	31007408	8.19e-07	0.0594059	202	-0.472608	0.0134738	30990689	30997447	6759	-	Phacu.CVR.006G232200	Protein of unknown function (DUF3506)
	BLINK	S06_31007408	Chr06	31007408	8.19e-07	0.0594059	202	-0.472608	0.0134738	31001506	31004030	2525	+	Phacu.CVR.006G232300	(1 of 1) PF08507 - COPI associated protein (COPI_assoc)
	BLINK	S06_31007408	Chr06	31007408	8.19e-07	0.0594059	202	-0.472608	0.0134738	31009630	31010861	1232	-	Phacu.CVR.006G232500	Haloacid dehalogenase-like hydrolase (HAD) superfamily protein
	BLINK	S06_31007408	Chr06	31007408	8.19e-07	0.0594059	202	-0.472608	0.0134738	31011644	31020761	9118	-	Phacu.CVR.006G232600
TYROSINE	BLINK	S07_22884181	Chr07	22884181	1.61e-18	0.0569307	202	-0.169675	7.97e-14	22882682	22890710	8029	+	Phacu.CVR.007G151500	NA
	BLINK	S05_36056350	Chr05	36056350	5.22e-08	0.0816832	202	-0.0747898	0.00128806	36043845	36047559	3715	+	Phacu.CVR.005G209400	(1 of 1) PTHR33427:SF2 - GENOMIC DNA, CHROMOSOME 3, P1 CLONE:MQD17
	BLINK	S05_36056350	Chr05	36056350	5.22e-08	0.0816832	202	-0.0747898	0.00128806	36047664	36050888	3225	-	Phacu.CVR.005G209500	phototropic-responsive NPH3 family protein, putative, expressed
	BLINK	S05_36056350	Chr05	36056350	5.22e-08	0.0816832	202	-0.0747898	0.00128806	36052882	36056758	3877	-	Phacu.CVR.005G209600	plastidic ATP/ADP-transporter, putative, expressed
	BLINK	S05_3121479	Chr05	3121479	2.42e-06	0.0643564	202	0.074583	0.0399055	3117130	3127423	10294	-	Phacu.CVR.005G030800	endonuclease, putative, expressed
	BLINK	S05_3121479	Chr05	3121479	2.42e-06	0.0643564	202	0.074583	0.0399055	3128652	3129274	623	+	Phacu.CVR.005G030900	Bifunctional inhibitor/lipid-transfer protein/seed storage 2S albumin superfamily protein
VALINE	BLINK	S09_36536543	Chr09	36536543	1.43e-14	0.0742574	202	-2.82299	7.08e-10	36525573	36531844	6272	+	Phacu.CVR.009G287200	recA protein, putative, expressed
	BLINK	S09_36536543	Chr09	36536543	1.43e-14	0.0742574	202	-2.82299	7.08e-10	36535849	36540294	4446	-	Phacu.CVR.009G287300	helix-loop-helix DNA-binding domain containing protein, expressed
	BLINK	S06_29910209	Chr06	29910209	7.77e-09	0.336634	202	-1.62985	0.000191746	29891763	29904150	12388	+	Phacu.CVR.006G217000	proline-rich spliceosome-associated (PSP) family protein
	BLINK	S06_29910209	Chr06	29910209	7.77e-09	0.336634	202	-1.62985	0.000191746	29909283	29910119	837	+	Phacu.CVR.006G217100	Conserved in the Green Lineage
	BLINK	S06_29910209	Chr06	29910209	7.77e-09	0.336634	202	-1.62985	0.000191746	29912948	29914716	1769	-	Phacu.CVR.006G217200	(1 of 1) PF12481 - Aluminium induced protein (DUF3700)
	BLINK	S09_2880169	Chr09	2880169	2.69e-07	0.0841584	202	-1.79024	0.00443212	2871008	2876926	5919	+	Phacu.CVR.009G032200	mitotic-like cyclin 3B from Arabidopsis
	BLINK	S09_2880169	Chr09	2880169	2.69e-07	0.0841584	202	-1.79024	0.00443212	2877838	2881295	3458	-	Phacu.CVR.009G032300	Protein phosphatase 2A regulatory B subunit family protein
	BLINK	S06_26937268	Chr06	26937268	3.91e-07	0.376238	202	1.61076	0.0048322	26926035	26927328	1294	-	Phacu.CVR.006G182100	Family of unknown function (DUF716)
	BLINK	S06_26937268	Chr06	26937268	3.91e-07	0.376238	202	1.61076	0.0048322	26933035	26934086	1052	+	Phacu.CVR.006G182200
	BLINK	S06_26937268	Chr06	26937268	3.91e-07	0.376238	202	1.61076	0.0048322	26935835	26944688	8854	-	Phacu.CVR.006G182300	structural constituent of ribosome, putative, expressed
	BLINK	S02_33301673	Chr02	33301673	1.48e-06	0.0742574	202	3.32593	0.0104075	33290005	33297656	7652	+	Phacu.CVR.002G244300	rab GDP dissociation inhibitor alpha, putative, expressed
	BLINK	S02_33301673	Chr02	33301673	1.48e-06	0.0742574	202	3.32593	0.0104075	33298496	33299716	1221	-	Phacu.CVR.002G244400	Protein of unknown function (DUF565)
	BLINK	S02_33301673	Chr02	33301673	1.48e-06	0.0742574	202	3.32593	0.0104075	33299728	33302709	2982	-	Phacu.CVR.002G244500
	BLINK	S02_33301673	Chr02	33301673	1.48e-06	0.0742574	202	3.32593	0.0104075	33305871	33307924	2054	+	Phacu.CVR.002G244600	magnesium-dependent phosphatase 1, putative, expressed
	BLINK	S02_33301673	Chr02	33301673	1.48e-06	0.0742574	202	3.32593	0.0104075	33307654	33311784	4131	-	Phacu.CVR.002G244700	(1 of 1) PF08507 - COPI associated protein (COPI_assoc)
	BLINK	S01_6988007	Chr01	6988007	1.1e-05	0.0717822	202	3.87869	0.0247126	6987893	6991118	3226	-	Phacu.CVR.001G065000	no apical meristem protein, putative, expressed
	BLINK	S01_7519453	Chr01	7519453	1.1e-05	0.0717822	202	3.87869	0.0247126	7525167	7526235	1069	-	Phacu.CVR.001G068600
